# Supplementary material for: Development and internal and external validation of a nomogram model for predicting the risk of chronic kidney disease progression in IgA nephropathy patients
Source: PeerJ. 2024 Oct 30;12:e18416. doi: 10.7717/peerj.18416 (PMC11531260; doi:10.7717/peerj.18416)
Supplement: Supplemental Information 1 [file peerj-12-18416-s001.xlsx]

## Sheet: Sheet1
ID	Y	Sex	Age	BMI	systolic_blood_pressure	diastolic_blood_pressure	CKD_stage	Nephrotic_syndrome	Hypertension	Diabetes	neutrophil	lymphocyte	hemoglobin	platelet	albumin	serum_creatinine	estimated_glomerular_filtration_rate	Serum_Uric_acid	Serum_cystatin_C	total_cholesterol	triglycerides	high_sensitivity_C_reactive_protein	Serum_IgG	Serum_IgM	Serum_IgA	Serum_C3	Serum_C4	urinary_protein_excretion	Hematuria	M	E	S	T1_2	C1_2	Treatment	Group
1	0	0	36	25.39	112	68	0	0	1	1	4.01	2.06	130	316	39.1	74	90.09	444.9	1.05	3.9	1.75	0.3	12.2	2.06	2.23	0.8	0.28	2.99	137	1	0	1	0	0	1	0
2	0	0	37	22.03	107	64	0	0	0	0	11.12	1.75	128	467	19	66	102.73	297	1.6	6.27	1.91	0.1	5.96	1.94	3.45	1.02	0.2	3.34	0	1	0	0	0	0	0	0
3	0	0	44	45.54	146	85	0	0	1	0	5.3	2.25	128	268	44.89	77.1	81.04	458	0.75	7.34	1.93	4.82	15	1.285	4.21	1.318	0.21	1.49	171	1	0	1	0	0	1	0
4	0	0	51	23.96	137	91	0	1	1	0	3.15	1.5	117	322	26.31	71.6	84.37	343.5	0.96	9.22	1.55	0.76	4.31	0.69	1.59	0.75	0.15	5.97	426	1	1	1	0	1	2	0
5	0	1	34	29.76	124	71	1	0	1	0	6.34	2.28	177	268	45.5	165	45.98	515.4	1.91	4.93	7.57	1.01	13.5	0.91	3.3	1.14	0.274	2.36	7	1	0	1	1	1	1	0
6	0	0	32	20.89	130	82	0	0	0	0	1.9	1.93	97	222	35.5	78	86.93	352.1	0.96	4.65	0.87	4.39	4.73	1.5	2.72	0.77	0.24	1.33	174	1	1	1	0	1	1	0
7	0	1	32	22.24	118	66	0	0	1	0	4.17	1.41	124	178	34.6	105	80.53	176.6	1.67	4.96	1.74	0.2	9.82	0.624	3.67	0.635	0.282	2.14	170	1	0	1	1	1	2	0
8	0	1	37	28.25	150	74	0	0	1	0	3.22	1.31	104	171	38.2	104.8	77.92	433.6	1.14	3.79	1.08	8.48	8.06	1.34	3.05	0.84	0.32	2.21	85	1	0	1	0	1	2	0
9	0	0	30	20.81	116	79	0	0	0	0	3.17	1.35	88	247	39.3	51.8	123.67	241.8	0.78	4.18	0.78	0.3	11	1.48	4.26	0.65	0.153	1.24	35	1	1	1	0	0	1	0
10	0	1	26	24.36	132	85	0	0	0	0	4.14	1.56	144	266	43.4	94.1	95.89	377.2	0.89	5.03	1.35	3.94	9.46	1.11	2.95	0.79	0.29	1.38	110	1	0	0	0	0	1	0
11	0	0	37	21.93	116	82	0	0	0	0	4.66	1.25	109	277	41.2	69.4	96.66	269.8	1.07	4.89	0.95	0.55	16.28	3.62	4.19	1.11	0.39	2.87	4	1	1	1	1	1	2	0
12	0	1	36	22.13	133	90	0	0	1	1	4.19	2.3	164	241	37.4	74	112.81	277.5	1.18	5.46	1.92	8.79	10.21	1.4	3.67	0.78	0.212	1.78	119	1	1	0	0	1	2	0
13	0	0	23	25.65	102	76	0	0	0	0	2.81	1.38	128	243	44	68	109.33	225.8	0.94	4.03	1.3	0.3	11	2.38	4.1	0.761	0.136	1.51	158	1	0	1	1	1	0	0
14	1	0	36	25.68			0	0		0	4.46	1.54	95	245	40.2	64.2	106.97	279	0.9	4.19	0.86	0.27	13.5	0.978	3.24	0.726	0.395	1.81	50	1	0	0	1	1	1	0
15	1	0	55	20.31	160	90	0	1	1	1	6.06	1.24	142	146	29.8	67	88.9	313	1.3	7.15	3.12	0.4	6.99	1	2.03	0.84	0.18	5.01		1	0	1	1	0	2	0
16	1	0	30	28.84	140	102	0	0	1	0	5.63	2.92	150	241	40.54	101.9	63.83	395	1.01	4.8	1.72	3.39	7.4	0.67	2.34	1.42	0.18	2.84		1	0	1	1	1	1	0
17	1	0	27	28.33	120	84	0	0	0	0	9.53	4.17	128	372	43.3	72	99.2	298.2	0.82	5.32	1.2	0.5	6.98	1.13	2.1	0.757	0.201	1.97	304	1	1	1	0	1	0	0
18	1	0	47	28.52	139	82	0	0	0	0	8.97	2.12	120	112	38.3	63.4	100.53	223.6	1.94	5.37	1.15	0.65	5.08	2.12	1.74	0.86	0.176	2.18	39	1	0	1	0	0	2	0
19	1	0	78	24.11	146	90	0	0	1	0	1.91	2.03	112	155	28.17	69	86.38	389.5	0.91	4.23	0.98	1.3	9.29	0.63	2.35	0.96	0.2	2.92	346	1	1	0	1	0	2	0
20	0	1	34	26.14	127	81	0	0	0	0	3.64	1.21	125	220	37	109.6	75.39	420.8	1.24	4.44	3.44	0.75	9.29	0.57	2.78	0.75	0.28	3.64	170	1	1	1	1	0	2	0
21	0	0	34	24.37	105	72	0	0	0	0	5.29	1.2	114	148	41.2	89.8	72.3	373.4	1.35	5.78	2.33	1.12	9.51	2.21	1.7	1.02	0.4	4.52	37	1	1	0	0	1	2	0
22	0	1	44	21.94	139	89	1	0	0	0	5.55	0.92	117	165	35.8	126.1	59.31	362.5	1.38	4.01	1.01	0.66	8.48	0.62	3.69	0.74	0.35	1.59	83	1	1	1	0	0	2	0
23	0	1	28	22.17	148	95	0	0	1	1	5.53	1.03	152	258	45.3	137	60.05	524.5	1.36	4.27	1.2	3.65	12.3	1.38	4.23	1.18	0.367	1.47	185	1	0	0	1	0	2	0
24	0	0	33	18.82	160	101	0	0	1	0	5.12	1.39	71	193	30.3	90.2	72.41	234.1	1.39	3.44	1.03	4.28	8.41	2.81	2.34	1.13	0.29	4.72	23	1	0	1	0	1	2	0
25	0	0	33	22.83	143	90	0	0	1	0	4.62	2.54	133	207	42.8	53	120.18	323.8	1.06	4.25	2.07	6.48	16.6	1.17	2.8	1.1	0.306	1.97	36	1	0	0	0	1	2	0
26	0	0	56	23.72	142	94	0	0	1	0	4.49	1.98	141	208	43.2	88.7	62.87	379.1	1.05	6.7	1.67	0.95	9.48	0.98	4.49	0.79	0.24	1.73	198	1	1	1	0	0	0	0
27	1	1	24	28.74	136	90	1	0	1	0	4.88	2.2	131	262	39.7	246	30.43	405.8	2.04	3.97	1.38	2.46	8.6	0.995	3.38	0.964	0.28	4.21	389	1	1	1	1	1	0	0
28	0	0	23	22.96	114	81	0	0	0	0	8.96	2.08	125	232	38.3	74	98.7	422.5	1.15	3.83	2.11	0.003	8.34	1.77	3.28	1.02	0.248	3.05	591	1	1	1	0	1	0	0
29	0	1	47	27.55	162	108	0	0	1	0	7.08	1.9	132	285	36.7	120	61.67	465.9	1.95	5	1.87	11.4	13.6	0.95	6.12	1.11	0.27	2.37	867	1	0	1	0	1	3	0
30	0	1	28	21.67	147	85	0	0	1	0	6.4	1.17	156	47	46.5	98	90.03	546.4	1.14	6.43	2.64	4.16	10.8	1.47	3.11	1.08	0.341	1.63	34	1	0	1	0	0	2	0
31	0	0	30	18.8	103	72	0	0	0	0	4.55	1.99	112	227	40.5	72	97.13	387.6	0.92	4.11	0.99	1.02	14.8	1.11	3.35	0.861	0.206	1.99	1852	1	1	0	0	1	0	0
32	0	1	25	18.69	150	92	0	0	1	0	3.59	1.64	146	254	38	77.5	119.57	360	0.74	3.54	1.46	1.21	8.83	1.6	3.3	0.71	0.15	2.25	82	1	1	0	0	1	3	0
33	1	0	28	29.16	133	80	0	0	1	1	4.72	1.91	121	276	35.78	82.4	83.68	472	0.94	6.79	1.46	3.76	9.9	1.637	2.09	1.289	0.198	3.8	24	1	1	1	0	0	1	0
34	0	1	31	32.58	105	57	0	0	0	0	5.37	2.29	157	187	47.3	79.5	113.44	417.7	0.73	4.28	0.99	40.51	14.63	0.67	2.18	0.96	0.36	1.06	0	1	0	1	1	0	2	0
35	1	1	21	28.33	122	66	0	0	0	0	7.11	2.51	147	96	39.7	69	129	214.4	0.79	3.89	0.57	3.7	10.2	1.2	5.1	0.911	0.197	1.69	55	1	1	1	0	1	0	0
36	0	0	67	19.23	153	91	0	0	1	0	7.15	4.95	142	404	33.2	55.1	93.44	168.5	1.1	7.23	1.53	0.55	5.45	1.08	2.43	0.76	0.19	2.77	66	1	1	0	0	0	2	0
37	1	1	35	26.94	120	72	1	0	0	0	4.52	1.43	161	162	36.7	136.8	57.26	490.9	1.94	2.92	1.66	1.13	9.29	0.32	2.19	0.77	0.3	1.33	49	1	0	0	1	0	1	0
38	0	1	23	17.52	103	64	0	0	0	0	3.13	1.86	128	208	43.5	70.4	126.15	291.7	0.84	6.56	2.2	0.59	9.88	2.51	3.56	0.74	0.31	1.45	12	1	0	1	1	0	2	0
39	1	1	35	20.62	220	113	1	0	1	0	3.86	1	109	136	41.6	296	22.52	673.7	3.63	3.47	1.13	14.63	7.82	1.89	2.88	0.777	0.24	2.85	793	1	0	1	1	0	0	0
40	1	1	39	28.33	126	82	0	0	0	0	3.72	1.95	134	152	41.2	71	112.35	302.4	1.14	4.73	1.58	0.76	8.64	1.07	2.65	0.764	0.203	1.95	65	1	1	0	0	0	2	0
41	1	0	32	22.73	101	76	0	0	1	0	3.52	1.62	124	192	36.1	55.7	119.07	305	0.89	5.65	0.92	1.53	10.3	1.38	2.95	0.95	0.214	1.22	159	1	0	1	0	1	2	0
42	1	0	31	28.48	135	96	0	0	1	0	3.13	1.53	129	215	36.06	73.3	94.39	288	0.76			1.99	7.9	2.94	3.05	0.893	0.161	7.61	53	1	1	1	0	1	0	0
43	1	1	23	24.15	120	71	0	0	0	0	3.54	1.57	175	213	44.63	85.7	114.37	358.2	3.73	4.58	1.59	3.49	7.64	0.97	1.51	0.79	0.14	1.56	81	1	1	0	1	0	1	0
44	1	1	32	38.93	135	77	1	0	1	1	9.84	0.27	124	134	38.1	340.4	19.43	539	4.24	5.2	2.42	36.35	8.14	0.919	1.81	0.934	0.343	4.53	87	1	1	0	0	1	2	0
45	0	0	66	26.22	162	86	0	0	1	1	3.82	2.88	132	164	41.8	36.3	107.95	243	0.79	4.51	3.14	0.46	12.1	0.733	3.57	1.01	0.185	1.71	18	1	0	0	0	0	1	0
46	0	1	26	22.97	122	76	0	0	0	0	4.38	1.23	141	285	42.1	94.8	95.03	405.9	1.05	4.65	1.92	0.003	12.7	0.66	2.66	0.97	0.32	1.09	37	1	0	1	0	0	1	0
47	0	1	40	20.52	126	78	0	0	0	0	5.82	2.73	146	323	41.4	95	85.93	659.4	1.35	5.84	2.63	2.48	8.63	0.763	4.92	1.01	0.285	1.58	12	1	0	1	1	0	1	0
48	0	0	18	18.96	132	85	0	0	0	0	6.79	2.36	111	317	43.2	63	125.07	292.1	0.96	3.51	0.99	1.27	11	1.85	6.27	0.996	0.277	1.18	2435	1	1	1	0	1	2	0
49	1	0	52	24.36	128	91	0	0	1	0	2.96	1.44	124	195	34.96	74.8	92.74	273.6	0.65	3.75	1.23	4.37	7.27	2.81	2.75	0.79	0.18	5.71	65	1	1	1	0	1	0	0
50	1	1	56	23.11	133	103	0	0	1	1	3.89	0.79	123	92	34.9	53.3	112.18	343	1.18	4.17	1.01	3.2	10.4	3.112	3.02	1.04	0.13	3.38	140	1	1	0	0	0	0	0
51	0	0	52	27.04	118	60	1	0	0	0	2.28	2.07	109	123	37.7	114.4	47.54	388.3	2.59	5.44	1.24	12.81	5.23	1.25	2.28	0.76	0.28	1.57	148	1	1	0	0	1	1	0
52	1	1	20	19.47	135	87	1	1	1	0	4.65	2.4	69	78	19.6	188.6	43.16	396.8	2.48	5.79	1.87	1.99	12.38	0.35	2.01	0.55	0.242	6.36	592	1	1	1	0	0	2	0
53	0	1	30	21.45	220	88		0	1	0	3.41	1.63	157	126	46.4				0.84	4.03	1.44	0.45	9.52	0.79	2.39	0.84	0.258	1.44	13	1	0	1	1	0	0	0
54	0	0	51	25.53	119	79	0	0	0	0	3.99	1.72	139	204	42.2	77.5	76.66	286.6	1.03	3.44	1.35	0.45	16.19	1.56	3.59	0.81	0.43	1.55	105	1	0	0	0	1	1	0
55	1	1	29	25.95	131	86	0	0	0	1	4.39	1.52	123	272	44.2	96	91.66	470.1	1.17	5.31	2.24	2.68	8.38	0.739	4.81	1	0.25	1.9	15	1	1	0	0	1	2	0
56	1	1	51	26.04	122	80	0	1	1	1	4.24	1.19	116	222	28.55	105.9	69.75	482	1.09	4.06	1	5.75	11.1	2.153	4.37	0.956	0.191	4.46	187	1	1	1	0	1	3	0
57	0	0	48	37.5	156	97	1	0	1	1	4.33	1.39	115	140	37.9	149	35.53	469	1.86	4.19	1.61	6.1	11.28	3.27	2.13	1.32	0.19	2.62	2	1	0	1	1	0	1	0
58	1	1	35	27.8	115	91	1	0	1	0	7.12	3.82	136	319	38.6	230.9	30.41	360.6	1.99	6.77	4.33	3.48	9.48	1.72	2.66	0.76	0.41	2.82	298	1	1	0	1	1	2	0
59	0	0	56	19.02	108	70	0	0	0	0	2.7	0.96	91	207	35.2	61.6	97.32	196	0.91	4.14	0.64	13.63	12	1.34	2.19	0.853	0.292	1.77	70	0	0	1	0	0	1	0
60	0	0	25	18.37	120	99	0	0	1	0	4.72	1.75	131	282	36.6	50	129.59	349	1	6.18	0.85	0.63	7.75	0.56	2.95	1.13	0.36	3.26	153	1	1	1	1	1	3	0
61	0	1	46	27.43	159	105	0	0	1	0	7.04	1.81	129	280	35.4	116.4	64.43	442.6	1.84	4.8	1.93	0.31	12.51	0.82	5.51	0.98	0.31	2.18	694	1	0	1	0	1	3	0
62	0	1	28	17.96	110	73	0	0	0	0	5.18	0.92	92	142	35	88.3	102.11	322.1	1.77	3.97	1.03	4.98	16.34	2.03	2.35	0.87	0.46	1.99	83	1	1	1	0	1	2	0
63	0	1	27	20.63	111	57	0	0	0	0	2.58	1.46	121	162	37.4	127.9	65.7	524.4	2.59	3.28	1.92	0.3	10.12	0.96	3.12	0.7	0.13	1.41	6	1	1	1	1	1	2	0
64	1	0	42	23.6	139	105	1	0	1	0	1.89	0.83	91	128	26.73	129.2	44.02	248	1.51	3.69	1.12	4.37	5.06	2.06	2.03	0.76	0.21	1.79	85	1	0	1	1	0	1	0
65	1	0	62	25.61	141	61	1	0	1	1	8.11	1.5	104	349	35.6	225	19.56	425.7	3.26	5.82	3.01	6.43	9.94	4.42	3.09	1.18	0.46	5.26	492	1	1	1	1	0	2	0
66	1	0	28	24.38	116	86	1	0	0	0	1.07	1.22	119	197	37.4	147.4	41.42	415.3	1.79	4.64	0.97	3.38	7.38	1.59	3.62	0.7	0.15	1.18	306	1	1	1	1	0	1	0
67	1	0	43	23.51	168	102	0	0	1	1	7.41	1.31	137	276	31.9	56	110.02	338.8	1.09	6.45	1.53	3.38	8.37	0.882	3.74	0.987	0.218	7.93	3480	1	1	1	1	0	3	0
68	1	1	27	28.33	107	71	1	0	1	1	13.13	0.98	163	284	45.3	182.5	42.75	510	1.98	5.03	5.4	8.98	7.62	0.616	3.55	0.653	0.266	1.5	3	0	1	0	0	0	2	0
69	0	0	26	22.79	213	81	0	0	1	0	3.1	1.64	81	252	38.9	84.2	82.67	400.2	1.01	4.16	1.3	5.58	13.25	1.65	2.15	0.86	0.34	1.62	10	1	1	0	0	0	0	0
70	0	0	47	20.7	221	117	1	0	1	0	6.25	1.13	121	252	38.7	143.9	37.32	422	2	9.17	1.33	2.72	9.75	1.56	3.36	1.06	0.209	5.38	1	1	0	1	1	1	3	0
71	1	1	52	30.11	118	95	0	0	1	0	5.96	1.42	154	202	36.5	82	94.36	467	1.01	4.51	2.1	2.54	8.34	0.79	3.09	1.26	0.27	2.69	459	1	1	1	0	1	2	0
72	1	0	30	28.33	175	119	0	0	1	0	7.07	2.16	167	192	31.4	74.5	93.21	545	0.99	9.01	4.3	4.82	4.78	0.93	2.15	1.11	0.199	8.14	0	1	1	1	0	0	0	0
73	1	0	25	23.36	150	104	0	0	1	0	7.04	1.24	152	345	42.4	26.3	160.09	270	0.9	6.04	2.89	0.62	16.6	1.15	2.57	1.2	0.216	6	11	1	1	0	1	1	2	0
74	1	1	27	25.75	127	96	0	0	1	0	7.19	2.64	137	348	37.8	97.5	91.23	482	1.01	5.55	1.96	3	6	0.78	2.27	1.21	0.269	2.78	89	1	0	1	1	1	0	0
75	1	1	49	27.55	133	97	1	0	1	0	10.63	1.47	129	157	34.7	285	21.37	532.8	2.53	3.48	0.91	2.1	7.49	0.239	3.97	0.772	0.406	6.07	62	1	0	0	1	1	2	0
76	1	0	50	20.31	137	67	0	0	0	0	2.77	1.49	93	176	38.1	91.6	63.09	215	0.9	11.17	12.66	6.5	9.56	0.599	2	0.792	0.266	6.34	349	1	0	0	1	0	0	0
77	0	0	40	23.38	100	69	0	0	0	1	3.17	0.71	108	139	38.6	87.7	71.32	410.8	0.94	4.55	1.17	0.95	10.49	0.94	1.18	0.8	0.29	1.15	262	1	0	1	0	0	1	0
78	1	0	63	25.68	144	64	1	0	1	1	8.15	1.59	107	369	36.7	232	18.72	448.1	3.37	6.06	2.92	4.05	10.8	4.55	3.43	1.34	0.428	5.72	4	1	1	1	1	0	2	0
79	0	1	33	24.84	131	84	0	0	0	0	3.91	1.15	138	222	40.2	78.6	112.39	399	0.94	4.05	5.78	3.77	11.8	0.81	3.01	0.613	0.17	1.89	509	1	1	0	0	0	1	0
80	0	0	29	20.74	109	74	0	0	0	0	3	1.26	86	241	38.2	52.8	123.76	229.7	0.67	4.01	0.8	0.054	10.12	1.35	3.83	0.71	0.15	1.18	28	1	1	1	0	0	1	0
81	0	0	39	27.13	113	76	0	0	0	1	7.38	1.28	140	183	46.9	59.9	110.67	275	0.72	4.78	0.83	0.3	13.7	2.36	3.18	0.95	0.21	1.43	631	1	0	0	0	0	0	0
82	0	1	71	22.31	155	95	0	1	1	0	8.92	1.26	121	155	23.9	90	73.78	366.4	1.35	6.84	1.14	1	8.15	1.5	2.69	0.775	0.278	12.71	165	1	1	0	0	1	3	0
83	0	1	63	32.42	139	94	0	0	1	0	8.45	0.78	150	176	38.5	87	81.31	433.8	1.27	4.66	1.75	0.52	9.55	0.757	3.42	0.71	0.157	1.56	387	1	1	1	0	1	3	0
84	1	0	26	22.46	112	82	0	0	0	0	4.63	0.47	125	163	42.9	35	144.7	282	0.78	4.54	1.01	11.84	9.1	0.79	3.9	1.49	0.43	4.09	3545	1	1	0	0	1	3	0
85	0	1	35	26.42	132	83	0	0	1	0	3.72	1.24	134	233	38.3	113	72.16	442.9	1.35	4.62	3.34	0.5	10.1	0.557	3.09	0.85	0.245	2.96	213	1	1	1	1	0	2	0
86	0	1	33	20.96	114	75	0	0	0	0	4.57	2	163	213	34.9	81.7	108.31	352	1	5.72	1.74	5.1	6.5	1.797	3.52	1.291	0.202	5.39	7	1	0	0	0	0	0	0
87	1	1	52	31.96	135	91	0	0	1	1	8.99	4.36	164	263	40.6	82	94.36	292.2	1.14	5.15	3.31	0.5	9.5	0.661	2.35	1.04	0.343	2.34	120	1	1	0	0	1	2	0
88	1	1	48	27.27	128	95	1	0	1	0	10.55	1.44	120	144	33.4	276.5	22.32	506.2	2.42	3.34	0.94	4.48	6.89	0.25	3.57	0.8	0.44	7.47	76	1	0	0	1	1	2	0
89	0	0	24	19.25	145	114	0	0	1	0	3.71	1.34	132	222	41.1	84.7	83.24	335.2	0.92	5.67	1.44	1.11	13.7	1.16	5.38	1.03	0.246	1.7	4	1	0	0	0	0	1	0
90	0	1	45	19.44	132	96	0	0	1	0	6.63	1.2	142	199	40.7	107.7	71.27	437.3	1.15	4.61	1.19	0.75	12.24	0.62	2.43	0.94	0.31	1.6	1	0	0	1	0	0	1	0
91	0	1	35	22.01	130	87	0	0	0	1	4.15	2.21	161	236	36.1	75.5	112.67	263.6	1.07	5.24	1.98	11.17	9.55	1.48	4.18	1.14	0.22	1.64	95	1	1	0	0	1	2	0
92	1	1	54	27.27	147	83	1	0	1	0	4.65	0.5	68	82	32.9	185.3	34.72	329	2.29	5.4	12.01	35.71	7.19	2.78	4.37	0.84	1.33	5.88	938	1	1	1	1	1	3	0
93	0	0	44	21.94	115	79	0	0	0	0	5.52	2.14	101	162	35.6	76.7	81.54	238.5	0.78	5	1.7	0.58	11.96	1.22	3	0.74	0.24	2.14	4	1	0	0	0	0	0	0
94	1	1	40	24.91	115	76	1	0	0	0	5.2	2.66	155	98	42.5	150.4	49.3	436.1	0.9	4.89	2.79	4.45	11.78	0.7	3.29	0.92	0.27	1.67	180	1	0	1	0	0	2	0
95	0	0	29	24.22	109	80	0	0	0	0	2.78	1.76	123	180	40.7	63.8	113.22	360	0.85	4.18	1.81	0.29	10.7	1.81	2.87	0.898	0.203	1.22	12	1	0	1	0	1	2	0
96	0	1	26	17.88	117	84	0	0	0	0	1.94	1.04	125	135	43.3	63.2	129.12	206.2	0.81	3.42	0.96	3.53	11	1.18	3.59	0.788	0.2	1.88	227	1	0	0	0	1	0	0
97	0	0	49	23.5	156	90	0	0	1	0	3.54	2.48	126	244	42	63	99.89	283.6	1.01	5.2	1.02	2.2	14.8	1.59	5.62	0.851	0.349	1.06	82	1	0	1	1	0	1	0
98	1	0	50	21.22	111	69	0	0	0	0	5.06	1.04	129	115	39.1	89.8	64.61	365.8	1.94	4.8	1.5	3.77	5.98	1.3	2.5	1.13	0.259	2.09	128	1	0	0	0	0	1	0
99	1	1	61	28.33	153	106	1	0	1	0	3.26	0.95	149	108	41.6	254	22.58	677.5	3.06	4.98	0.53	0.2	11.2	1.11	2.76	0.88	0.216	3.91	67	1	1	1	1	1	0	0
100	1	1	57	29.02	138	98	0	0	1	1	12.98	1.83	146	122	32.9	90	81.4	351	1.39	6.19	3.1	0.76	5.28	0.931	2.27	0.788	0.243	6.33	176	1	0	0	1	1	2	0
101	1	1	61	38.93	151	104	1	0	1	1	12.84	2.03	131	371	33.5	141.6	45.76	516	2.9	6.86	2.82	3.23	7.75	0.678	2.82	1.15	0.385	6.7	59	1	0	1	1	1	0	0
102	1	0	25	23.24	131	83	1	0	0	0	3.38	1.19	110	202	39	110.6	59.87	564.3	1.77	4.81	6.66	0.65	12.88	1.16	1.85	0.97	0.44	3.64	176	1	0	1	1	1	3	0
103	1	1	31	27.09	144	98	0	1	1	0	12.93	3.07	126	247	25.68	90.3	97.31	283.1	0.83	5.96	1.4	4.86	7.45	1.4	2.42	0.8	0.33	6.28	779	1	0	1	1	1	0	0
104	0	0	34	26.72	122	84	0	0	1	0	3.28	0.54	105	81	43.2	91.1	71.06	475	2.59	4.94	0.85	4.4	11.3	2.411	4.39	1.08	0.29	2.04	235	1	0	1	0	0	0	0
105	1	1	34	25.61	147	106	0	0	1	0	5.3	1.49	170	219	40.1	80	110.32	505.1	1.1	6.52	3.56	4.04	5.76	0.874	2.51	1.14	0.448	3.2	98	1	0	1	0	1	2	0
106	0	0	23	24.1	115	81	0	0	0	0	4.52	2.44	130	289	44.2	46.2	134.88	286.9	0.66	3.74	1.92	4.39	10.49	0.96	3.65	0.95	0.24	1.57	14	1	0	0	0	0	0	0
107	1	1	51	31.84	132	88	0	0	0	0	8.95	4.27	155	258	38.5	83.6	92.82	277.6	1.03	4.94	3.41	0.75	8.74	0.68	2.12	0.92	0.38	2.15	148	1	1	0	0	1	2	0
108	1	0	45	22.04	95	72	1	0	0	0	4.2	1.05	93	134	39.8	103	56.7	273	1.56	6.15	2.11	0.3	9.4	1.16	3.22	0.95	0.38	1.97	97	1	0	1	0	0	1	0
109	0	1	32	20.89	107	70	0	0	0	0	4.4	1.91	158	193	33.8	83.3	106.53	334.4	0.89	5.49	1.79	7.48	5.98	1.67	3.17	1.14	0.24	5.12	6	1	0	0	0	0	0	0
110	1	0	31	23.51	135	90	0	0	1	0	5.19	2.3	122	217	39.5	57	119	331	0.92	4.71	1.32	0.44	13.7	2.8	1.69	0.97	0.211	1.6	195	1	1	0	0	1	1	0
111	0	1	27	20.08	143	63	1	0	1	0	5.3	1.38	105	200	31.38	289.3	24.49	657.4	2.25	5.37	1.23	0.34	5.89	1.56	3.61	0.88	0.24	2.37	558	1	1	1	1	1	2	0
112	0	0	65	26.1	159	83	0	0	1	1	3.78	2.79	129	159	39.7	37	108.03	230.9	0.68	4.33	3.23	0.71	11.13	0.6	3.21	0.89	0.2	1.57	14	1	0	0	0	0	1	0
113	0	1	57	25.4	108	68	1	0	0	0	3.1	1.25	112	195	41.7	328.3	17.03	507.3	3.07	4.02	0.78	3.77	10.21	1.32	3.38	0.88	0.31	1.1	2	1	1	1	1	0	0	0
114	1	1	38	32.01	180	124	0	0	1	0	3.84	1.7	156	263	38.7	100	81.9	465	1.01	5.87	3.98	3.76	11.18	0.4	4.77	1.19	0.32	3.74	0	1	0	0	0	0	1	0
115	1	0	47	28.33	160	108	0	0	1	0	8.76	0.86	142	270	38.3	36.7	122.92	201	0.69	7.77	1.09	2.18	8.82	1.4	2.4	0.888	0.293	2.38	5	1	0	0	0	0	2	0
116	0	1	49	26.45	116	79	0	0	0	0	4.99	1.41	151	165	39.2	89.6	86.56	349.6	0.8	4.54	3.94	1.11	7.87	1.1	2.16	0.8	0.24	1.32	118	1	0	0	0	0	0	0
117	0	0	55	18.74	103	68	0	0	0	0	2.62	0.93	82	194	33.9	62.8	96.12	186.2	0.8	3.97	0.66	2.54	11.04	1.6	1.97	0.75	0.33	2.18	56	0	0	1	0	0	1	0
118	1	1	46	20.62	126	82	0	1	0	0	5.37	1.48	154	286	29.9	105	72.99	217.4	1.96	9.11	1.73	8.65	6.81	1.92	1.82	0.963	0.273	4.82	9	1	0	1	0	0	0	0
119	0	1	28	20.7	118	62	0	0	1	0	2.75	1.55	123	168	38.5	131.9	62.87	552	0.84	3.42	1.86	8.79	11	1.09	3.47	0.64	0.138	1.48	8	1	1	1	1	1	2	0
120	0	0	41	23.5	103	72	0	0	0	1	3.21	0.8	111	144	39.9	86	72.53	432.4	1.05	4.74	1.14	0.7	11.4	1.07	1.31	0.773	0.251	1.25	327	1	0	1	0	0	1	0
121	0	0	42	22.82	163	101	1	0	1	0	4.25	1.38	102	168	37	195.9	26.62	446.4	2.16	5.44	1.43	0.65	11.22	1.41	3.75	0.67	0.17	2.82	3	1	1	1	1	0	2	0
122	0	1	18	24	125	73	0	0	0	0	6.96	0.66	167	353	19.4	73.5	132.03	440	0.92	11.01	1.87	0.27	12.1	2.07	3.01	0.48	0.24	2.83	5	1	0	0	0	0	0	0
123	0	0	21	25.53	144	83	0	0	1	0	9.2	2.84	102	216	28.812	55.6	128.71	288.5	0.89	5.55		0.468	4.18	1.05	1.05	0.58	0.107	2.03	19	1	1	1	1	0	2	0
124	1	1	18	20.69	127	76	0	0	0	0	3.71	1.66	180	233	46.73	84	117.19	377	3.84			1.11	8.3	1.098	1.68	0.899	0.124	1.65	66	1	1	1	0	0	1	0
125	0	1	32	32.65	112	62	0	0	0	0	5.54	2.38	162	193	49.4	77.9	113.6	439.7	2	4.46	0.96	8.98	15.9	0.65	2.42	1.09	0.321	1.12	2876	1	0	1	1	0	2	0
126	1	1	24	23.51	120	71	0	0	0	0	4.33	1.6	167	211	49.2	79.5	119.17	494	0.94	4.98	1.66	1.86	9.88	1.59	2.51	0.658	0.19	1.28	79	1	1	1	0	0	1	0
127	1	0	32	23.32	122	79	0	0	0	0	6.29	1.94	113	298	42.6	46.9	125.99	198.9	0.59	5.29	4.32	10.68	11.59	1.12	3.47	0.91	0.35	1.12	33	1	1	1	0	0	0	0
128	0	1	49	26.55	111	78	0	0	0	0	4.21	2.22	136	203	41.4	100.2	75.62	317.3	1.26	4.96	7.56	3.94	11.13	1.44	3.59	0.95	0.18	2.04	106	1	1	1	0	0	1	0
129	0	1	45	22.17	124	79	0	0	1	1	4.25	1.97	112	194	43.8	104.3	74.1	390	1.31	2.97	4.68	26.98	5.8	1.77	5.14	1.09	0.372	1.95	639	1	0	0	0	0	1	0
130	1	0	36	28.91	118	73	0	0	0	0	4.98	1.61	116	238	43.4	42	127.03	286.5	0.54	3.99	1.1	15.7	15	0.843	3.1	1.31	0.326	1.04	58	1	0	1	0	0	1	0
131	0	1	41	26.15	119	79	0	0	0	0	4.49	0.92	153	157	46.1	60.3	118.47	297.9	0.62	5.36	2.63	0.55	10.21	2.15	1.98	0.88	0.15	1.37	408	1	0	0	0	0	0	0
132	0	1	23	20.42	182	97	0	0	1	0	2.89	1.13	129	202	44.3	58	136.61	385	0.66	3.87	0.98	36.35	8.76	0.83	2.15	0.74	0.29	1.37	10	1	0	1	0	0	0	0
133	0	0	18	17.12	116	74	0	0	0	0	4.84	1.75	144	262	46.1	46	140.89	330	0.89	4.67	0.89	0.7	12.3	0.98	3.76	1.07	0.46	1.26	213	1	0	1	0	0	1	0
134	1	0	26	20.62			0	0		0	2.47	1.19	99	149	35.7	70.9	101.78	386	1.9	2.99	4.02	0.35	10.1	2.12	2.82	0.969	0.199	2.81	125	1	1	1	0	0	1	0
135	0	0	51	39.33	140	94	0	0	1	1	3.39	1.88	124	99	38.7	49.7	108.17	353.5	0.78	4.66	1.71	2.4	10.1	1.97	2.78	0.94	0.273	1.4	19	1	0	0	0	0	1	0
136	1	0	30	24.84	115	85	0	0	0	0	1.92	1.94	111	348	32.3	84	80.62	551.9	1.54	3.94	2.04	7.71	11.8	1.57	3.35	1.05	0.327	3.59	385	1	1	1	1	1	0	0
137	0	0	29	18.52	98	70	0	0	0	0	4.47	1.96	103	214	38.4	73.4	95.55	368.2	0.81	3.95	1.02	3.4	13.62	1.37	3.02	0.51	0.24	2.45	35	1	1	0	0	1	0	0
138	0	1	67	22.79	125	85	0	0	0	0	5.99	0.3	137	100	31.56	102.2	65.06	381.9	2.59	4.52	0.57	12.81	5.15	0.9	2.61	0.78	0.29	1.32	1	1	1	1	0	0	3	0
139	1	1	19	19.4	128	82	1	1	0	0	4.48	2.31	64	72	18.71	182.9	45.1	377	2.37	5.56	1.93	0.5	12.19	0.36	1.81	0.75	0.28	6.05	728	1	1	1	0	0	2	0
140	0	0	24	24.22	118	84	0	0	0	0	4.56	2.53	139	294	46.3	45.3	134.81	302	0.77	3.9	1.86	2.01	11.4	1.09	4.05	1.08	0.207	1.71	18	1	0	0	0	0	0	0
141	0	0	43	22.94	168	103	1	0	1	0	4.33	1.41	111	173	38.3	202	25.47	469.9	2.27	5.67	1.39	0.4	12.2	1.15	4.17	0.613	0.154	3.06	4	1	1	1	1	0	2	0
142	0	1	33	20.64	177	117	1	0	1	0	4.68	2.31	133	224	38.2	201.9	36.27	442.7	2.08	4.43	4.43	6.48	9.29	1.53	4.25	0.82	0.33	5.61	164	1	0	1	1	1	2	0
143	0	0	44	23.5	130	74	0	0	1	0	5.17	1.68	128	226	41.9	72	88.04	376.1	0.99	3.66	1.59	1.3	9.29	0.81	2.35	0.7	0.199	1.6	7	1	0	1	0	1	1	0
144	0	1	19	20.28	143	82	0	0	1	0	4.13	2.09	157	235	48.4	77	125.06	362	0.94	4.82	1.94	1.08	7.53	1.07	3.69	1.29	0.31	1.8	11	1	1	1	0	1	2	0
145	1	0	24	23.29	147	101	0	0	1	0	7	1.15	149	325	40.3	26.8	160.22	256.5	0.79	5.8	2.98	0.87	15.27	1.02	2.31	1.06	0.25	6.12	135	1	1	0	1	1	2	0
146	0	1	68	22.86	132	90	0	0	1	0	6.16	0.39	142	120	32.66	105.4	62.25	402	0.84	4.71	0.55	23.9	5.6	1.028	2.9	0.754	0.25	1.39		1	1	1	0	0	3	0
147	0	0	28	18.66	123	85	1	0	0	0	4.02	0.82	115	253	32.4	135.2	45.02	450.3	2.7	4.67	1.44	2.2	8.66	0.81	1.86	0.71	0.29	1.01	83	1	1	0	0	0	1	0
148	0	1	21	24.07	141	95	0	0	1	0	3.18	1.79	142	174	46.1	86.7	109.67	449.9	1.14	3.97	0.94	4.39	10.9	0.79	2.87	0.89	0.248	1.36	13	1	0	1	0	0	0	0
149	0	0	33	20.97	147	97	1	0	1	0	7.94	1.04	135	246	39.9	132.9	45.32	304.5	1.89	7.38	1.5	7.12	13.16	0.91	2.55	0.84	0.37	2.34	430	1	1	1	1	0	2	0
150	1	0	56	23.88	151	95	1	0	1	0	4.69	1.73	130	180	42.7	126	41.14	424.6	1.69	5.98	5.29	6.6	9.36	1.63	3.28	1.1	0.346	4.71	1	1	0	1	1	0	0	0
151	0	1	21	28.88	139	77	1	0	1	0	4.82	2.55	144	199	40.3	168.4	49.15	673.5	2.14	4.85	2.08	6.6	10.7	0.7	3.24	0.99	0.316	2.88	7	1	1	0	1	0	2	0
152	0	0	55	27.3	155	99	0	0	1	0	3	1.34	131	194	41.1	73.4	79.6	448.4	1.27	4.8	3.91	4.4	10.67	0.86	2.45	1.11	0.31	2.44	3	1	0	1	1	1	2	0
153	1	0	24	22.95	116	67	0	0	0	0	7.34	2.52	110	320	38.4	60.5	122.57	259.4	0.78	3.54	1.99	0.85	8.22	1.97	2.83	0.75	0.46	1.44	483	1	1	1	0	1	0	0
154	1	0	31	22.66	94	71	0	0	0	0	3.35	1.53	119	172	35	56.8	119.13	289.8	0.78	5.42	0.95	3.91	9.48	1.25	2.66	0.84	0.25	1.34	196	1	0	1	0	1	2	0
155	0	0	21	21.67	134	90	0	0	1	0	4.22	1.16	134	136	40.6	58	126.93	339.2	0.77	3.84	1.35	0.3	7.82	1.19	3.8	0.757	0.333	1.43	1117	1	1	1	0	0	1	0
156	1	0	49	20.24	130	62	0	0	0	0	2.6	1.4	88	156	37	88.9	65.86	204.3	1.01	10.72	10.1	8.88	5.76	0.59	1.81	0.94	0.29	6.46	429	1	0	0	1	0	0	0
157	0	0	38	27.11	136	88	0	0	0	0	1.5	1.27	118	35	35.9	81	79.63	433.4	0.73	5.95	1.79	5.38	8.8	1.3	3.11	0.77	0.36	1.96	82	1	0	0	1	0	2	0
158	0	0	35	25.32	109	65	0	0	0	0	3.97	1.97	127	296	38	75.5	88.54	422.7	0.94	3.74	1.8	0.55	11.22	1.93	2.01	0.888	0.15	3.11	110	1	0	1	0	0	1	0
159	1	1	73	24.61	183	94	1	0	1	1	5.04	1.55	128	93	41.4	116.7	53.14	356	2.12	4.52	2.21	0.99	16.5	1.1	1.8	0.99	0.388	3.21	1	1	0	1	0	0	2	0
160	0	0	21	25.65	103	80	0	0	0	0	3.75	1.15	106	199	36.8	89.2	79.85	373.4	0.73	5.68	2.05	3.46	8.8	0.978	3.42	1.02	0.266	1.52	676	1	0	1	0	0	1	0
161	0	1	20	24	134	90	0	0	1	0	3.01	1.7	140	168	44	88.4	107.87	427.4	1.03	3.81	0.97	1.09	10.03	0.66	2.58	0.78	0.28	1.29	10	1	0	1	0	0	0	0
162	0	0	55	27.32	106	78	0	0	1	1	11.25	1.51	125	290	45	39	113.91	189.7	0.69	4.84	0.8	1.1	8	1	2	0.9	0.2	1.05		1	0	1	0	0	2	0
163	0	0	22	22.53	109	81	0	0	0	0	6.69	1.88	133	223	46.4	88.8	79.73	382.9	1.07	4.45	1.62	1.07	12.33	1.57	1.92	0.78	0.25	1.3	77	0	0	1	0	0	1	0
164	0	0	49	24.85	114	77	0	0	0	0	4.77	1.47	107	241	43.7	66.3	93.9	240.4	0.73	4.04	0.7	1.05	14.35	1.87	2	0.74	0.25	1.15	62	1	0	0	0	0	0	0
165	0	1	47	22.24	132	114	0	0	1	0	6.18	1.07	151	125	40.1	101.9	75.14	271.5	1.18	4.79	0.84	6.22	5.6	2.35	2.03	1.02	0.159	1.06	96	1	1	1	0	0	1	0
166	0	1	49	18.82	128	97	0	0	1	0	4.14	0.71	153	175	45.7	96.8	78.85	275	1.17	5.93	1.21	1.26	14.6	1.154	2.99	0.889	0.167	1.97	0	1	1	1	0	0	0	0
167	1	1	66	25.61	146	80	0	1	1	0	3.6	1.68	173	222	22.3	54	104.01	409.2	0.84	6.65	1.02	3.3	5.16	0.996	4.84	0.691	0.214	10.14	449	1	0	1	1	0	2	0
168	0	1	50	26.83	116	80	0	0	0	0	4.29	2.25	145	216	43.5	103.3	72.38	334	1.37	5.17	8.2	1.56	12.1	1.18	3.99	1.08	0.163	1.66	132	1	1	1	0	0	1	0
169	1	1	50	20.69	135	105	1	0	1	0	4.3	1.75	163	178	47.1	158	43.3	504.6	1.98	5.61	1.81	0.6	13.5	1.06	3.89	0.96	0.307	1.93	467	1	0	1	1	0	1	0
170	1	0	47	27.37	107	76	1	0	0	0	2.4	1.14	109	205	36.4	111.6	50.74	387.6	1.42	6.2	1.46	8.48	13.04	2.52	3.19	1.26	0.39	2.88	3	1	0	1	1	1	1	0
171	0	0	35	21.6	102	73	0	0	0	0	2.64	1.75	119	138	38.69	65.1	105.93	386	2.59	4.14	0.98	4.05	15.3	1.77	3.42	0.934	0.205	1.64	24	1	1	1	0	0	1	0
172	1	1	61	23.03	161	98	1	0	1	0	5.36	0.75	129	175	33.2	208	28.75	406	2.21	5.98	2.21	10.12	9.3	0.68	4.16	1.53	0.42	4.88	498	1	1	0	1	1	2	0
173	0	0	45	22.22	120	81	0	0	0	0	5.6	2.17	110	175	36.9	75.2	82.94	251	0.89	5.21	1.65	0.33	13	0.964	3.33	0.719	0.206	1.74	5	1	0	0	0	0	0	0
174	0	1	42	24.09	143	96	0	0	1	1	7.3	2.3	177	234	45	87	94.23	500.6	0.91	6.12	5.1	1.13	7.48	0.852	2.37	0.768	0.247	1.46	34	1	0	1	0	0	1	0
175	1	1	18	25.29	108	93	0	1	1	0	4.1	1.55	164	348	14.87	91.5	107.18	406	0.99	15.99	0.81	5.75	4.4	1.302	3.96	1.389	0.233	16.51	59	1	0	1	0	0	0	0
176	1	0	46	20.82	139	105	0	0	1	0	2.45	1	112	174	37.46	94.4	62.56	299.3	1	5.48	2.21	1.99	9.02	0.72	2.47	0.7	0.11	1.8	98	1	0	0	1	0	1	0
177	0	1	46	19.72	137	98	0	0	1	0	6.71	1.23	151	212	42.8	111	68.25	460.3	1.26	4.8	1.16	0.5	13.3	0.599	2.7	1.07	0.275	1.3	1	0	0	1	0	0	1	0
178	1	0	35	23.73	132	94	0	0	1	0	3.03	1.4	108	92	35.27	78.6	84.35	388	1.02	5.49	0.95	13.63	8	2.55	2.8	1.35	0.372	1.43		1	0	1	1	0	1	0
179	1	1	41	24.87	127	93	0	0	1	0	4.5	2.5	162	229	35.1	81.6	102.53	457.9	1.02	5.64	6.12	6.55	11.7	0.67	2.21	1.2	0.28	6.31	62	1	0	0	1	0	1	0
180	1	1	60	22.92	154	93	1	0	1	0	5	0.64	126	169	32.1	201.8	30.02	385.7	2.1	5.74	2.28	0	8.56	0.7	3.74	1.35	0.46	4.64	613	1	1	0	1	1	2	0
181	1	1	18	27.96	132	97	0	0	1	0	4.97	1.87	162	407	42	90.3	106.62	417.1	1.13	5.34	1.69	1	9.84	0.58	2.09	0.73	0.201	2.7	288	1	0	1	0	0	1	0
182	0	1	19	23.28	119	69	0	0	0	0	2.94	1.34	122	220	32.3	108.6	85.9	589	1.18	4.44	1.82	28.81	6.22	2.49	2.81	1.08	0.41	3.73	536	1	1	0	0	1	3	0
183	0	0	24	18.26	113	94	0	0	1	0	4.36	1.64	128	276	35.5	51	129.65	331.6	0.89	5.93	0.88	0.88	7.13	0.58	2.66	0.99	0.4	3.1	122	1	1	1	1	1	3	0
184	0	1	39	20.45	123	75	0	0	0	0	5.78	2.64	143	303	39.3	92.2	89.71	626.4	1.24	5.61	2.71	4.86	7.94	0.63	4.43	0.89	0.32	1.7	10	1	0	1	1	0	1	0
185	1	1	41	24.98	122	81	1	0	1	0	5.37	2.75	157	104	44.6	155	47.21	459.1	1.03	5.09	2.71	2.07	12.8	0.68	3.66	1.05	0.238	1.76	146	1	0	1	0	0	2	0
186	1	1	57	31.2	179	116	1	0	1	1	7.06	2.03	157	171	31.9	201	30.81	408.5	1.94	6.24	2.74	7.89	9.46	2.04	3.47	1.02	0.259	4.83	618	1	1	0	0	1	3	0
187	1	1	38	24.62	111	79	0	0	0	1	4.87	2.35	144	289	46.7	60	121.25	467	0.82	5.21	2.71	1.87	11	1.23	4.9	0.887	0.242	1.85	480	1	1	0	0	1	1	0
188	0	0	34	21.16	115	79	0	0	0	0	3.06	1.29	131	192	37.3	51.1	120.78	261.9	0.73	3.73	1.72	0.35	10.12	1.79	2.84	0.75	0.21	1.16	212	1	0	0	0	0	1	0
189	1	0	26	28.33	160	110	1	0	1	0	5.67	0.86	79	86	30.6	316.3	16.69	427	3.75	9.37	3.7	2.41	6.99	2.4	3.11	1.23	0.374	7.86	37	1	1	1	1	0	0	0
190	0	1	18	18.35	96	60	0	0	0	0	3.29	1.63	112	239	38.8	57	142.5	329.7	2.7	3.34	0.67	7.51	10.49	0.96	2.8	0.72	0.11	1.69	409	1	0	0	0	0	0	0
191	0	0	58	28.77	149	94	1	0	1	0	3.45	0.93	135	241	41.3	97	55.64	323	0.91	5.87	1.18	3.65	9.37	3.85	2.55	0.92	0.19	1.75	21	1	0	1	1	0	1	0
192	0	1	48	18.75	121	92	0	0	1	0	3.97	0.62	148	155	43.6	93.9	82.37	261.3	1.06	5.69	1.25	3.64	13.43	1.02	2.69	0.78	0.18	2.09	0	1	1	1	0	0	0	0
193	0	0	23	22.6	112	84	0	0	0	0	6.73	1.97	136	243	48.5	91.5	76.36	403	1.18	4.64	1.57	0.82	13.4	1.7	2.13	0.89	0.218	1.41	96	0	0	1	0	0	1	0
194	1	0	33	22.2	106	77	0	1	0	0	2.59	1.42	87	101	27.51	101.9	62.49	301.2	1.54	4	1.23	4.45	7.91	0.82	2.38	0.71	0.31	5.2	287	1	0	1	1	1	2	0
195	1	0	47	23.69	143	92	0	0	1	0	17.18	2.05	91	218	35.1	90.8	65.11	352.3	1.17	5.55	1.7	0.35	14.08	3.46	4.57	0.82	0.21	1.01	181	1	1	1	1	1	2	0
196	0	1	24	25.12	139	95	0	0	1	0	2.57	2.27	146	256	41.2	86.7	107.37	498.5	2.59	5.27	0.91	0.65	12.33	1.44	2.09	0.85	0.29	1.97	39	1	0	1	0	0	2	0
197	0	1	68	19.23	138	87	0	0	1	1	8.35	1.28	102	155	36.6	73	90.6	389.8	1.32	3.29	1.44	5.9	8.4	0.606	2.19	1.06	0.216	6.13	1049	1	1	0	0	1	3	0
198	0	1	32	24.17	149	112	0	0	1	1	3.02	3.85	135	230	38.9	61	125.61	446	0.66	10.92	23.05	2.15	10.5	1.706	3.24	1.261	0.167	1.5	2	1	0	0	0	0	1	0
199	0	0	31	18.8	130	90	0	0	1	0	2.71	1.7	129	221	44.4	51	123.43	284.7	0.61	6.12	1.48	0.58	7.4	1.3	4.64	0.768	0.119	1.42	1160	1	0	1	0	0	1	0
200	0	0	23	24.98	147	99	0	0	1	0	3.4	1.22	123	176	35.7	60.2	123.63	242	0.79	3.57	1.15	40.51	10.76	1.66	4.01	0.84	0.4	1.55	6	1	0	1	0	1	1	0
201	1	1	42	24.98	134	98	0	0	1	0	4.86	2.61	165	235	36.2	80	104.29	482	1.13	5.87	6.63	4.17	12.72	0.65	2.45	1.36	0.24	6.64	50	1	0	0	1	0	1	0
202	0	1	45	16.79	130	70	1	0	1	0	2.41	1.13	122	174	42.2	131	56.25	525.8	1.45	5.91	2.75	3.7	11.2	0.704	1.9	1	0.236	3.37	30	1	0	0	0	0	1	0
203	1	0	51	21.29	118	74	0	0	0	0	5.23	1.13	134	135	41.2	92.6	61.83	385	1.94	5	1.46	1.39	12.6	2.55	2.92	0.81	0.38	1.97	104	1	0	0	0	0	1	0
204	1	1	37	31.94	173	119	0	0	1	0	3.48	1.59	153	257	37.6	97	85.56	441.8	0.9	5.64	4.1	8.48	10.29	0.41	4.29	1.05	0.36	3.55	8	1	0	0	0	0	1	0
205	1	0	34	23.66	125	89	0	0	0	0	2.86	1.31	103	72	34.17	80.2	82.88	368.6	0.91	5.27	0.98	4.37	7.36	1.5	2.52	1.08	0.31	1.55	0	1	0	1	1	0	1	0
206	0	0	22	22.89	107	76	0	0	0	0	8.6	1.97	123	226	37.2	75.5	97	401.4	1.04	3.68	2.17	0.09	7.67	1.64	2.95	0.9	0.28	2.9	473	1	1	1	0	1	0	0
207	1	1	44	25.47	119	89	0	0	1	0	3.62	2.89	140	231	36.19	91.5	87.42	406	0.98	4.62	0.38	8.98	13.3	1.121	5.05	0.947	0.198	1.69	26	1	0	1	1	0	1	0
208	0	0	33	26.65	115	79	0	0	0	0	3.11	0.45	100	61	41.1	88.4	74.2	451.3	0.66	4.74	0.88	6.78	10.4	2.28	3.95	0.95	0.33	2.16	188	1	0	1	0	0	0	0
209	0	0	52	24.37	153	81	0	0	1	0	5.01	1.89	118	260	42.7	68.1	89.01	360.8	0.96	5.43	2.04	0.85	14.26	1.88	4.6	0.73	0.26	1.13	13	0	0	0	0	0	2	0
210	0	0	62	27.06	158	91	1	0	1	0	5.4	1.39	115	119	33.4	90	59.24	301	1.38	5.23	2.38	13.32	6.42	0.69	3.95	1.17	0.4	2.22	1337	1	0	0	1	1	1	0
211	1	0	35	22.15	170	96	1	0	1	0	6.47	1.04	103	170	33.2	168.8	33.47	541.9	1.86	5.15	3.28	3.38	11.41	1.44	2.49	0.77	0.31	2.57	1030	1	0	1	1	1	1	0
212	0	0	53	24.44	160	86	0	0	1	0	5.18	1.98	123	266	44.8	66.8	90.48	379.8	2.59	5.66	1.98	0.6	15.5	2.01	5.11	0.83	0.221	1.19	16	0	0	0	0	0	2	0
213	0	1	27	24.43	135	90	0	0	1	1	4.31	1.65	149	286	45.5	97	91.8	397	1	5.24	1.31	1.39	5.6	2.39	2.57	1.26	0.46	1.26	137	1	0	0	0	0	1	0
214	1	1	77	25.68			1	0		0	3.96	1.38	121	163	26.3	175	31.66	347.1	2.14	4.72	1.85	10.1	10.7	0.584	5.51	0.568	0.211	3.12	1767	1	0	0	0	1	2	0
215	0	1	43	27.39			0	0		0	3.83	2.59	147	254	44.1	86	94.89	494.3	1.22	4.54	2.36	0.3	14.6	0.864	3.64	0.835	0.188	1.82	40	1	0	0	0	0	1	0
216	0	0	33	24.84	138	100	0	0	1	0	3.63	1.49	143	166	48.3	52	120.94	339	0.99	5.21	2.62	0.3	12.3	0.8	2.29	1.21	0.45	1.5	20	1	0	0	0	0	1	0
217	1	1	51	29.99	113	93	0	0	1	0	5.88	1.39	145	197	35.2	83.6	92.82	443.7	0.9	4.33	2.16	4.92	10.12	1.08	2.64	0.95	0.29	2.47	565	1	1	1	0	1	2	0
218	0	0	31	23.23	128	76	0	0	0	0	2.33	1.63	129	232	50.7	54	121.13	205	0.5	3.6	0.83	7.49	13.3	1.19	2.23	0.772	0.27	1.91	152	1	0	1	0	0	1	0
219	0	0	21	16.79	109	70	0	0	0	0	6.18	2.14	118	154	35.1	54.1	129.87	210	1.14	4.04	1.61	0.53	12.65	3.09	4.37	0.93	0.27	1.17	568	1	0	1	0	0	2	0
220	0	1	48	26.61	187	133	1	0	1	0	3.4	0.95	126	162	39	239	26.63	545.1	2.14	6.11	1.23	0.38	8.46	1.11	3.15	0.922	0.214	4.67	182	1	0	1	1	1	2	0
221	1	0	20	20.23	117	79	0	0	0	0	1.78	1.8	122	247	37.3	55.7	119.06	238	1.03	4.03	0.88	3.4	9	2.35	4.18	0.74	0.17	1.53	68	1	1	1	1	0	1	0
222	0	0	19	17.01	109	69	0	0	0	0	4.48	1.64	141	256	44	46.9	138.04	313.5	0.78	4.48	0.92	0.95	11.32	2.21	3.38	0.94	0.5	1.2	170	1	0	1	0	0	1	0
223	1	1	72	24.49	180	91	1	0	1	1	5	1.46	125	88	39.3	113.2	55.51	338.2	2.01	4.34	2.28	1.24	15.18	0.97	1.62	0.87	0.42	2.95	123	1	0	1	0	0	2	0
224	0	0	68	19.35	156	94	0	0	1	0	7.19	5.04	145	409	34.5	54	93.41	177.4	1.21	7.53	1.49	0.3	5.92	1.21	2.7	0.867	0.169	3.01	82	1	1	0	0	0	2	0
225	0	1	37	24.24	156	100	0	0	1	0	3.64	2.36	149	256	45.1	110	73.5	343.9	1.19	6.11	0.98	1.13	12.7	0.951	2.62	0.966	0.338	1.63	9	1	0	1	0	0	1	0
226	1	1	50	20.07	157	97	1	1	1	0	4.37	1.79	98	200	27.4	189	34.87	291.6	1.84	3.85	1	1.2	7.41	1.37	2.44	0.599	0.119	4.13	71	1	1	1	1	1	1	0
227	0	1	45	22.06	142	92	1	0	1	0	5.59	1.01	120	170	37.1	130	56.78	381.6	1.49	4.18	0.98	0.41	9.22	0.601	4.1	0.845	0.312	1.73	104	1	1	1	0	0	2	0
228	0	1	50	26.57	119	82	0	0	1	0	5.03	1.5	154	170	41.3	87.8	88.1	368	0.91	4.73	3.83	0.86	8.55	1.23	2.4	0.908	0.208	1.43	147	1	0	0	0	0	0	0
229	1	1	18	25.22	101	88	0	1	0	0	3.93	1.54	159	328	13.98	88.8	108.8	385.7	0.88	15.35	0.83	8.13	4.05	1.17	3.56	1.22	0.27	12.38	73	1	0	1	0	0	0	0
230	1	1	37	24.34	106	77	0	0	0	0	4.79	2.32	135	276	44.6	61.2	121.11	443.7	0.71	5	2.79	4.25	10.12	1.49	4.41	0.78	0.28	2.27	590	1	1	0	0	1	1	0
231	1	0	34	23.51	140	108	1	0	1	1	4.79	2	114	195	33.6	174.5	32.39	615	2.26	6.69	4.39	12.54	11.5	1.55	4.7	1.36	0.275	4.76	3	1	0	0	1	1	3	0
232	0	1	58	18.9	159	82	0	0	1	0	2.63	0.98	127	123	38.7	74.4	83.42	220	0.66	4.09	2.24	0.57	15	1.36	2.29	0.8	0.19	1.14	25	1	0	0	1	0	1	0
233	0	0	23	25.65	110	86	0	0	0	0	5.98	2.57	118	185	46.2	62	122.25	314.3	0.95	4.4	1.07	0.2	15.3	1.6	5.61	0.849	0.2	3.1	1142	1	0	0	0	1	1	0
234	0	0	19	18.84	129	82	0	0	0	0	6.75	2.27	108	312	41.1	64.3	120.3	277.5	0.85	3.37	1.02	3.65	10.12	1.72	5.64	0.88	0.31	1.09	48	1	1	1	0	1	2	0
235	0	0	32	22.76	136	85	0	0	0	0	4.45	2.45	131	201	40.7	54.1	120.21	307.6	0.95	4.08	2.13	4.1	15.27	1.04	2.52	0.97	0.34	1.87	29	1	0	0	0	1	2	0
236	0	1	34	20.76	182	120	1	0	1	0	4.76	2.34	142	229	39.5	208.1	34.73	466	2.19	4.61	4.3	4.1	10.1	1.27	4.72	0.928	0.297	6.1	205	1	0	1	1	1	2	0
237	0	1	28	18.65	106	72	0	0	0	0	4.78	1.06	138	250	38.8	112	76.61	322.3	1.3	3.78	0.62	87.14	13	1.54	3.96	1.1	0.273	1.83	140	1	0	1	0	1	3	0
238	0	0	28	21.63	137	97	1	0	1	0	3.36	1.23	104	179	34.9	305	17.2	483.9	2.7	4.84	0.82	0.29	9.59	1.15	3.29	0.888	0.232	3.9	133	1	0	0	1	1	0	0
239	1	1	31	38.65	130	75	1	0	0	1	9.76	0.24	115	121	36.8	330.2	20.29	512.1	4.13	4.99	2.49	25.26	7.49	1.18	1.63	0.82	0.38	5.57	107	1	1	0	0	1	2	0
240	0	1	38	28.37	153	77	0	0	1	0	3.26	1.4	107	176	40.3	108	74.62	456.4	1.25	3.95	1.05	6.1	8.76	1.47	3.39	0.952	0.288	2.4	1357	1	0	1	0	1	2	0
241	0	0	22	31.98	116	75	0	0	0	0	3.59	2.03	152	301	46.6	79.4	91.27	606.1	2	3.96	0.53	3.95	10.86	0.92	4.91	1.02	0.46	1.26	1	1	1	1	0	0	0	0
242	0	1	33	29.48	119	69	1	0	0	0	6.26	2.25	168	255	43.4	160.1	48.01	489.6	1.8	4.73	6.98	3.39	12.42	1.17	2.97	1	0.31	2.9	6	1	0	1	1	1	1	0
243	0	0	43	45.47	143	80	0	0	1	0	5.13	2.16	123	248	42.79	78.6	79.73	435.1	0.64	7.05	1.99	0.34	13.8	1.16	3.79	1.16	0.25	1.61	137	1	0	1	0	0	1	0
244	0	0	29	23.71	122	85	0	0	0	0	4.43	1.82	138	203	34.8	45	130.44	413	0.71	5.25	1.37	10.85	9.9	2.99	3.2	1.02	0.175	1.5		1	1	1	0	0	1	0
245	1	0	29	25.68			0	0		0	24.51	1.41	141	164	42.8	65.1	110.49	335	1.1	6.36	2.79	0.6	6.96	1.45	2.51	0.819	0.212	1.73	12	1	1	1	0	1	2	0
246	1	0	37	22.79	126	86	0	0	0	0	4.18	1	143	198	46.88	57.3	113.89	225.2	0.62	6.23	0.93	0.86	12.42	2.13	4.34	1.08	0.26	1.8	169	1	1	1	0	0	1	0
247	1	0	33	23.44	125	82	0	0	0	0	6.33	2.03	116	303	44.7	46	125.91	209.4	0.7	5.51	4.19	8.3	12.6	1.25	3.86	1.03	0.315	1.22	27	1	1	1	0	0	0	0
248	0	1	57	23.74	159	96	0	0	1	0	8.39	2.21	141	186	30.8	71.7	98.61	264	0.66	3.41	0.82	1.13	4.57	0.89	1.09	0.72	0.199	3.36	11	1	1	1	0	0	3	0
249	1	0	46	25.61			0	0		0	3.95	1.98	133	214	43.1	89.3	66.91	321	1.1	4.46	4.23	1.3	11.9	0.804	2.74	1.02	0.229	1.12	268	1	0	0	0	0	1	0
250	0	0	25	19.53	150	116	0	0	1	0	3.79	1.37	141	235	43.2	83	84.72	352.8	1.03	5.91	1.4	0.86	11	1.23	2.27	0.75	0.132	1.38	5	1	0	0	0	0	1	0
251	0	0	23	32.05	123	80	0	0	0	0	3.76	2.12	157	307	48.7	77.8	92.91	638	1.89			1.57	11.8	1.05	5.45	1.16	0.426	1.32	1	1	0	1	0	0	0	0
252	1	0	29	24.45	123	91	1	0	1	0	1.43	1.33	121	203	38.5	152	39.64	437.2	1.9	4.83	0.94	1	8.02	1.72	4.02	0.638	0.161	1.24	249	1	1	1	1	0	1	0
253	1	0	25	25.67	100	76	1	0	1	0	6.47	2.09	125	133	39.35	115.9	56.58	678	1.4	5.39	5.37	3.2	7.6	0.713	2.45	0.981	0.21	1.92	198	1	0	0	0	0	2	0
254	1	0	54	20.24	157	87	0	1	1	0	5.89	1.15	139	126	28.91	68.3	87.46	297.4	1.19	6.86	3.21	0.65	6.43	0.97	2.01	0.78	0.187	5.13	0	1	0	1	1	0	2	0
255	0	1	28	20.15	150	68	1	0	1	0	5.47	1.47	110	220	32.48	298.2	23.45	692	2.36	5.59	1.19	11.43	6.4	1.693	4.01	1.002	0.205	2.5	697	1	1	1	1	1	2	0
256	1	0	48	25.68			0	0		1	5.09	2.39	123	226	41.6	74	82.81	506.4	1.42	5.9	2.78	3.7	9.94	2.21	4.45	0.995	0.198	1.24	284	1	0	0	0	0	2	0
257	1	1	34	18.56	112	75	1	0	0	0	3.59	1.73	98	166	40.9	219	32.65	320	2.03	5.18	1.28	0.2	9.76	0.67	4.56	0.675	0.213	2.15	750	0	0	1	1	1	3	0
258	0	0	38	22.04	123	87	0	0	0	0	5.02	1.36	112	283	43.3	68	98.4	284	1.18	5.09	0.92	0.3	5.7	2.39	4.66	1.26	0.35	1.01	5	1	1	1	1	1	2	0
259	0	0	20	21.39	129	88	0	0	0	0	4.14	1.13	125	131	38.5	59.2	126.96	322.2	0.66	3.69	1.39	0.55	7.19	1.45	3.42	0.78	0.37	1.32	94	1	1	1	0	0	1	0
260	1	0	43	23.67	146	110	1	0	1	0	2.06	0.92	96	148	27.62	133.2	42.14	261	1.62	3.84	1.09	1.99	5.5	2.188	2.26	0.734	0.187	1.88	69	1	0	1	1	0	1	0
261	0	0	29	24.77	115	83	0	0	0	0	4.99	1.19	112	249	33.19	63.2	114.5	261.3	0.67	4.1	0.97	6.5	11.28	1.27	4.55	1.01	0.27	3.71	146	1	0	0	0	1	3	0
262	0	0	28	23.94	104	78	0	0	0	0	2.7	1.73	114	167	38.6	65.1	111.25	342	0.74	4.01	1.86	0.54	9.84	2.07	2.58	0.79	0.24	1.5	10	1	0	1	0	1	2	0
263	1	0	39	29.9	168	114	0	0	1	0	9.68	2.06	154	355	38.37	58.1	111.79	343	0.75	4.4	0.81	14.11	14.2	0.95	4.46	1.43	0.326	1.76	15	0	0	1	0	0	1	0
264	1	0	48	27.48	114	81	1	0	1	0	2.76	1.25	112	211	37.5	115	48.59	408	1.53	6.46	1.42	5.38	14.17	1.29	3.54	1.43	0.35	3.03	0	1	0	1	1	1	1	0
265	0	0	30	18.68	127	87	0	0	0	0	2.67	1.61	126	216	42.3	52	123.51	270.5	0.5	5.88	1.52	0.83	14.08	0.95	3.35	0.84	0.43	1.31	628	1	0	1	0	0	1	0
266	0	0	41	24.92	105	72	0	0	0	0	3.87	3.09	89	467	41.6	54.1	112.85	273	0.66	4.74	2.47	1.2	11.8	2.17	2.94	1.14	0.182	1.36	63	1	0	1	0	1	3	0
267	1	0	38	22.86	129	89	0	0	0	0	4.35	1.09	146	218	48.98	56.2	113.82	237	0.73	6.49	0.9	0.61	13.5	2.263	3.49	1.231	0.225	1.68	137	1	1	1	0	0	1	0
268	1	0	19	19.58	105	78	0	0	0	0	4.19	1.37	96	346	30.9	105.1	66.41	331.6	1.29	6.11	2.53	0.21	8.56	2.77	2.13	0.98	0.24	3.15	4537	1	0	1	1	1	0	0
269	0	0	37	22.79	138	105	0	0	1	0	3.49	2.48	130	258	37.6	46	122.43	363.2	0.81	7.32	2.74	2.6	6.14	2.21	2.35	1.17	0.243	2.76	42	1	1	0	0	0	2	0
270	1	0	35	28.84	111	68	0	0	0	0	4.62	1.52	114	232	41.3	42.8	127.13	272.2	0.43	3.83	1.13	4.61	13.8	0.71	2.79	1.15	0.36	2.11	71	1	0	1	0	0	1	0
271	0	0	44	31.63	117	85	0	0	0	0	3.87	1.99	121	191	41	60	106.8	470.1	1	6.45	7.59	5.13	4.2	3.29	2.42	1.12	0.195	1.37	1	1	1	0	0	0	0	0
272	1	0	23	25.68	155	96	0	0	1	0	3.81	1.82	113	220	37.9	81	88.49	338.1	1.3	5.99	1.8	0.4	12.7	2	1.9	1.21	0.46	3.5	1283	1	1	1	1	1	2	0
273	0	0	34	21.09	150	100	1	0	1	0	7.98	1.13	138	251	42	137	43.39	320.5	2	7.69	1.46	4.74	14.3	1.04	2.83	0.954	0.331	2.54	537	1	1	1	1	0	2	0
274	1	1	67	27.23	114	86	0	1	0	0	2.14	1.89	106	117	25.41	83.6	82.95	253.7	1.17	4.92	3.46	1.15	5.76	0.47	2.25	0.92	0.31	11.03	2075	1	1	0	0	1	3	0
275	1	0	33	19.05	124	84	0	0	0	0	1.95	1.89	127	253	38.4	54.6	119.01	250.5	1.03			3.5	9.78	2.48	4.64	0.68	0.159	1.62	55	1	1	0	0	0	1	0
276	0	1	24	17.63	110	69	0	0	0	0	3.49	1.97	131	214	45.6	69	126.31	307	0.95			0.34	10.74	1.28	3.96	0.84	0.27	1.53	15	1	0	1	0	0	2	0
277	1	1	26	25.68	120	91	0	0	1	0	7.02	2.55	132	342	36.7	94.6	95.28	457.9	1.14	5.33	2.02	5.38	5.52	0.65	2.04	1.06	0.3	2.64	109	1	0	1	1	1	0	0
278	1	1	32	27.16	151	103	0	1	1	0	13.1	3.16	131	267	26.57	88.5	99.02	298	0.94	6.21	1.36	2.48	8.1	1.529	2.69	0.905	0.296	8.37	633	1	0	1	1	1	0	0
279	0	0	26	25.71	168	97	0	0	1	0	7.56	1.49	140	124	45	52	127.03	344.1	0.7	4.23	0.91	0.48	9.55	0.56	1.63	0.8	0.153	5.32	34	1	1	1	0	0	2	0
280	1	0	28	24.65	114	79	0	0	0	1	3.48	1.74	106	367	44.4	47	129.5	234.5	0.61	6.21	1.33	0.11	9.65	2.55	2.35	0.959	0.162	1.27	0	1	0	1	0	1	1	0
281	0	0	30	24.84	118	88	0	0	0	0	5.16	1.28	117	269	34.29	62	116.38	275	0.78	4.27	0.94	17.59	10.9	0.71	1.93	0.86	0.199	3.59	182	1	0	0	0	1	3	0
282	1	1	33	18.49	105	70	1	0	0	0	3.42	1.64	96	160	38.8	212.4	34.12	304	1.92	4.97	1.32	0.45	8.98	0.69	4.1	0.73	0.25	2.04	923	0	0	1	1	1	3	0
283	0	0	36	21.92	100	59	0	0	0	0	10.76	1.64	125	461	18.11	67.3	101.03	282.2	1.49	6.02	1.97	0.56	5.48	3.17	3.11	0.9	0.19	3.17	0	1	0	0	0	0	0	0
284	0	0	35	22.86	136	92	0	0	1	0	2.61	1.21	114	312	38.8	92	69.73	349.7	1.33	4.54	0.68	0.2	10.6	0.74	4.15	0.797	0.215	2.14	845	1	0	0	1	0	3	0
285	1	0	34	22.27	113	82	1	1	0	0	2.95	1.53	89	107	28.4	105	59.85	317	1.65	4.17	1.19	14.63	8.6	0.95	2.64	0.81	0.27	5.47	233	1	0	1	1	1	2	0
286	0	1	44	26.95	131	87	1	0	0	0	3.47	1.75	158	123	40.2	134.5	54.87	321	1.85	5.57	2.45	1.42	12.9	1.55	3.02	0.92	0.243	1.03	3	1	0	0	0	0	0	0
287	0	1	54	25.17	133	78	0	0	0	0	4.13	1.42	163	128	38.27	85.4	88.57	277.4	0.71	3.88	5.77	0.83	8.79	1.34	4.18	0.7	0.157	1.66	22	1	1	1	0	0	2	0
288	0	0	26	19.96	105	72	0	0	0	0	2.73	1.62	129	233	38.5	51	127.84	268.3	0.55	4.71	0.93	0.55	6.96	1	1.85	0.71	0.16	1.27	123	1	0	1	0	1	0	0
289	0	1	55	25.24	136	83	0	0	1	0	4.3	1.51	168	148	40.37	83.7	90.13	292	0.82	4.04	5.6	4.45	5.66	1.693	2.04	0.74	0.282	1.54	27	1	1	1	0	0	2	0
290	0	0	47	22.03	108	76	1	0	0	0	6.1	1.53	116	276	32.4	195	25.84	397.4	1.96	4.82	2.09	128.1	7.91	0.815	3	1.44	0.308	1	717	1	1	0	0	1	0	0
291	1	0	27	27.4	136	85	0	0	0	0	6.86	2.24	128	204	35	57.1	122.31	364.7	0.9	5.81	4.26	0.11	6.81	0.81	2.39	0.81	0.24	1.29	52	1	0	1	1	0	2	0
292	1	0	67	25.68	158	84	0	0	1	0	4.23	2.01	143	178	45.1	76.8	69.28	397	1.3	7.19	2.03	3.41	7.34	1.1	1.57	1.05	0.343	5.67	993	1	1	0	0	1	2	0
293	0	0	59	28.84	156	99	1	0	1	0	3.81	1.04	138	247	43.4	100	53.26	340	1.02	6.11	1.15	1.27	10.19	3.98	2.83	1.05	0.2	1.84	26	1	0	1	1	0	1	0
294	1	0	27	24.53	111	76	0	0	0	1	3.44	1.65	103	362	42.3	47.9	129.59	222.8	0.5	5.96	1.37	0.36	8.88	2.42	2.12	0.84	0.18	1.17	0	1	0	1	0	1	1	0
295	0	0	56	22.51	132	69	1	0	0	0	3.91	0.93	104	260	37.4	132.9	38.56	401.9	2.3	3.77	1	0.85	11.85	1.28	2.74	0.89	0.33	1.46	0	1	0	1	1	0	1	0
296	0	1	27	17.99	124	89	0	0	0	0	2.3	1.15	128	141	45.4	62	129.24	217	0.92	3.56	0.93	1.15	8.06	0.97	3.11	1.22	0.25	1.98	284	1	0	0	0	1	0	0
297	1	1	41	20.62			1	0	1	0	5.37	1.67	154	185	35.52	191.5	36.56	544	1.49	3.98	2.4	13.75	13	0.685	2.02	1.014	0.26	1.46	10	1	0	1	1	0	1	0
298	0	1	48	22.31	135	117	0	0	1	0	6.22	1.16	154	145	42.2	105	71.97	285.8	1.29	4.99	0.82	3.84	6.89	1.06	2.46	0.81	0.21	1.15	120	1	1	1	0	0	1	0
299	1	0	23	25.68			0	0		1	4.6	2.57	140	207	49.4	42	139.18	373.3	0.63	3.76	0.62	51.1	10.9	0.784	4.23	1.21	0.365	1.32	4244	1	0	1	0	1	0	0
300	0	1	47	26.33	182	131	1	0	1	0	3.32	0.92	117	149	37.7	231.8	27.82	517.8	2.03	5.87	1.27	0.63	7.78	1.37	2.84	0.81	0.25	5.74	146	1	0	1	1	1	2	0
301	1	1	43	25.4	112	84	0	0	0	0	3.45	2.8	135	211	35.09	88.8	91.27	385.7	0.87	4.44	0.39	0.6	12.24	0.99	4.55	0.83	0.29	1.81	32	1	0	1	1	0	1	0
302	1	1	53	20.62	155	108	0	1	1	1	3.47	1.64	130	206	28.9	64	106.27	295.7	1.1	6.82	1.41	1.17	5.99	1.08	2.2	0.966	0.357	6.28	385	1	1	1	0	1	3	0
303	1	1	19	28.03	139	102	0	0	1	0	5.14	1.96	167	427	44.1	88.5	111.58	439	1.24	5.56	1.64	5.3	10.7	2.39	2.32	1.44	0.372	2.58	234	1	0	1	0	0	1	0
304	1	0	38	29.83	165	109	0	0	1	0	9.51	1.97	149	335	37.27	59.3	111.82	325.9	0.64	4.22	0.83	3.02	13.06	0.82	4.01	1.06	0.29	1.88	185	0	0	1	0	0	1	0
305	0	1	27	18.37	101	70	0	0	0	0	4.7	1.03	129	237	37.5	108.6	80.07	306.2	1.19	3.63	0.64	76.05	11.96	1.8	3.56	0.97	0.31	2.25	112	1	0	1	0	1	3	0
306	0	0	34	21.53	95	68	0	0	0	0	2.47	1.66	114	118	37.59	66.4	104.14	366.7	2.59	3.97	1.01	1.99	14.08	2.13	3.08	0.95	0.262	1.76	19	1	1	1	0	0	1	0
307	0	0	24	25.1	150	102	0	0	1	0	3.44	1.31	126	181	36.8	59	123.59	254.7	0.9	3.72	1.12	51.6	11.7	1.79	4.45	0.957	0.368	1.68	7	1	0	1	0	1	1	0
308	1	0	25	23.07	119	70	0	0	0	0	7.38	2.61	113	325	39.7	59.3	122.52	273	0.89	3.69	1.93	0.6	8.93	2.1	3.14	0.855	0.424	1.57	393	1	1	1	0	1	0	0
309	0	0	39	27.18	143	93	0	0	1	0	1.67	1.36	123	41	37	79.4	81.01	456.2	0.73	6.2	1.74	5.77	9.56	1.43	3.45	0.88	0.321	2.06	1228	1	0	0	1	0	2	0
310	0	1	36	24.17	149	95	0	0	1	0	3.28	2.27	147	250	43	106.7	76.79	326.7	1.08	5.87	1.01	3.51	11.68	0.82	2.36	0.85	0.37	1.55	7	1	0	1	0	0	1	0
311	0	0	50	24.92	121	82	0	0	0	0	4.94	1.56	112	247	45.8	65	95.51	253.1	2.59	4.21	0.68	0.8	15.6	2	2.22	0.84	0.211	2.21	78	1	0	0	0	0	0	1
312	0	0	32	20.73	95	62	1	0	0	0	3.29	0.91	108	183	41.5	139.4	43.09	530.7	2.59	4.86	1.4	0.23	9.41	0.94	2.07	0.65	0.25	1.51	104	1	1	1	1	0	1	1
313	0	0	36	25.89	184	124	0	0	1	0	4.63	2.18	134	219	42.7	53	117.68	304.5	0.89	4.11	5.63	1	10.2	1.26	5.5	1.24	0.246	1.98	8	1	0	0	0	0	1	1
314	0	0	35	24.61	179	122	0	0	1	0	4.55	2.15	125	206	40.6	54.1	117.7	289.3	0.78	3.95	5.8	3.38	9.38	1.52	4.95	1.09	0.28	2.44	6	1	0	0	0	0	1	1
315	1	1	21	23.39	158	100	1	0	1	0	5.13	1.73	120	226	35.3	406.4	16.94	721.1	3.17	5.96	2.74	6.88	4.99	0.64	2.25	0.83	0.34	4.69	125	1	0	1	1	1	0	1
316	1	1	22	21.51	163	103	1	0	1	0	5.21	1.82	129	231	36.6	419	16.21	759	3.28	6.21	2.66	4.5	5.42	0.623	2.5	0.946	0.3	4.1	20	1	0	1	1	1	0	1
317	1	0	27	25.09	126	75	0	0	0	0	4.55	1.82	116	256	34.68	84	82.32	448.4	0.83	6.52	1.5	6.14	9.11	1.51	1.88	1.13	0.22	3.61	295	1	1	1	0	0	1	1
318	0	0	52	25.81	124	81	0	0	1	0	4.07	1.75	148	217	44.3	76	77.96	301.7	1.14	3.58	1.31	0.2	17.6	1.3	3.99	0.922	0.39	2.26	131	1	0	0	0	1	1	1
319	0	0	47	22.67	137	98	0	0	1	0	2.8	1.72	132	256	46.8	72.9	84.91		0.73	4.26	2.17	0.32	16.3	1.49	2.54	0.91	0.177	2.2	1	1	0	0	0	0	1	1
320	0	1	62	32.35	136	91	0	0	1	0	8.41	0.69	147	156	37.4	88.7	79.98	412.1	1.16	4.47	1.8	0.77	8.79	0.63	3.08	0.73	0.17	1.68	310	1	1	1	0	1	3	1
321	1	0	29	23.39	121	91	0	0	1	0	7.22	0.96	112	237	39.7	51	125.18	328	0.7	4.9	0.67	7.1	12.1	2.46	3.09	1.21	0.27	2.5	375	1	1	1	0	1	0	1
322	0	0	57	26	147	96	0	0	1	0	4.57	2.01	150	221	45.3	87	63.92	399	1.16	6.98	1.62	0.7	10.3	0.724	4.99	0.767	0.201	1.41	248	1	1	1	0	0	0	1
323	0	1	58	25.47	115	73	1	0	1	0	3.27	1.34	117	215	43.8	338.5	16.29	534	3.18			1.39	11.1	1.445	3.76	1.002	0.275	2.16	3	1	1	1	1	0	0	1
324	0	0	57	22.58	139	74	1	0	1	0	4.27	1.04	107	266	38.5	137	36.92	423	2.41			0.6	12.88	1.41	3.04	1.01	0.29	1.54	0	1	0	1	1	0	1	1
325	1	0	25	22.39	105	77	0	0	0	0	4.27	0.36	122	157	40.8	35.7	144.77	267.9	0.67	4.36	1.04	0.75	8.37	0.66	3.51	1.31	0.47	3.89	4360	1	1	0	0	1	3	1
326	1	1	23	24.67	133	87	1	0	0	0	4.84	2.11	128	242	38.6	238.6	31.8	385.5	1.93	3.81	1.42	4.84	7.91	0.87	3.04	0.85	0.32	4.33	478	1	1	1	1	1	0	1
327	0	0	50	39.26	133	89	0	0	0	1	3.22	1.79	119	93	37.6	50.7	108.22	335.8	1.89	4.47	1.76	4.78	9.29	1.84	2.5	0.83	0.31	1.33	15	1	0	0	0	0	1	1
328	0	0	25	23.88	105	75	0	0	0	0	1.37	2.47	120	275	38.9	52.2	127.77	371.4	0.96	3.22	1.09	0.3	11.9	1.05	2.56	0.79	0.193	1.4	297	1	0	0	1	0	0	1
329	0	0	24	21.81	98	70	0	0	0	0	1.2	2.38	115	269	37.8	53.2	127.86	352.8	0.73	3.09	1.12	5.75	10.95	0.92	2.3	0.81	0.18	1.33	238	1	0	0	0	0	0	1
330	0	1	18	23.35	126	74	0	0	0	0	3.3	1.45	125	226	33.4	112	82.77	620	1.29	4.62	1.77	39.9	6.76	1.26	3.12	1.23	0.37	3.93	670	1	1	0	0	1	3	1
331	0	1	41	24.02	136	91	0	0	1	1	6.94	2.21	175	228	42.9	88.7	92.69	475.6	0.8	5.88	5.25	3.51	6.88	0.72	2.13	0.79	0.28	1.39	27	1	0	1	0	0	1	1
332	0	1	20	28.81	132	72	1	0	0	0	4.65	2.46	142	193	38.2	163.3	51.36	639.8	2.03	4.66	2.14	2.48	9.84	0.57	2.92	0.87	0.35	2.73	6	1	1	0	1	0	2	1
333	0	1	19	31.91	128	78	0	0	0	0	5.43	2.1	143	367	44.1	94.7	99.96	502	2	5.36	1.96	0.09	15.3	2.39	7.06	1.573	0.37	2.3		1	0	1	0	1	1	1
334	0	1	18	30.84	121	73	0	0	0	0	5.26	2.01	138	347	42	91.9	104.38	476.9	0.73	5.15	2.02	4.1	9.11	0.65	3.83	1.38	0.21	2.42	0	1	0	1	0	1	1	1
335	0	1	27	23.04	129	81	0	0	0	0	4.55	1.32	143	291	44.2	97.7	91.01	427.3	1.16	4.84	1.86	4.17	13.8	0.79	2.96	1.1	0.28	2.15	46	1	0	1	0	0	1	1
336	0	1	65	21.67	143	93	0	1	1	0	3.23	1.71	126	150	29	66	96.45	432	1.1	7.75	4.73	1.12	8.11	2.26	4.18	1.05	0.441	6.66	433	0	0	0	1	0	2	1
337	1	1	36	25.01	127	77	1	0	1	0	4.69	1.52	163	168	37.8	141	54.83	516.7	1.94	3.04	1.61	0.3	10.1	0.31	2.43	0.87	0.266	1.4	4	1	0	0	1	0	1	1
338	0	1	70	22.03	150	93	0	1	1	0	8.84	1.23	112	142	23.01	91.8	72.53	348.1	1.24	6.57	1.17	3.38	7.5	1.76	2.42	0.8	0.31	9.53	132	1	1	0	0	1	3	1
339	1	1	55	24.55	152	85	1	0	1	0	4.73	0.53	77	87	34.2	191	33.24	346.3	2.4	5.62	11.2	46.8	7.81	2.52	1.52	0.952	1.29	3.84	763	1	1	1	1	1	3	1
340	0	1	33	22.55	120	84	0	0	0	0	3.27	2.18	150	292	52.5	103.5	81.37	367	0.96			0.6	12.1	2.5	2.14	0.79	0.212	1.7	98	1	0	1	0	1	0	1
341	0	1	32	21.48	113	79	0	0	0	0	3.1	2.09	145	286	50.4	100.4	85	348.7	0.84	5.27	1.23	2.07	11.13	2.37	1.93	0.81	0.25	1.62	78	1	1	0	1	1	0	1
342	0	0	22	18.9	116	75	0	0	0	0	6.54	2.25	121	160	36.2	53	129.84	221	1.25	4.21	1.56	0.28	13.75	1.86	4.85	1.06	0.23	2.23	710	1	0	1	0	0	2	1
343	0	0	43	31.35	112	83	0	0	0	0	3.79	1.96	112	178	38.9	61.2	106.85	446.6	0.89	6.19	7.02	7.51	22.26	3.55	2.18	0.99	0.21	1.69	1	1	1	0	0	0	0	1
344	1	0	42	21.89	146	75	1	1	1	0	3.52	2.03	99	220	23.91	124.2	46.18	226.1	1.66	11.03	2.46	0.25	5.21	0.61	2.25	1	0.33	3.74	41	1	1	0	0	1	3	1
345	1	0	43	24	153	80	1	1	1	0	3.88	2.14	102	226	24.8	128	44.22	238	1.77	11.49	2.39	0	5.66	0.59	2.5	1.14	0.29	3.65	33	1	1	0	1	1	3	1
346	1	1	68	25.34	121	91	0	1	1	0	2.5	2	109	123	26.3	82	84.33	267	1.28	5.12	3.36	0.9	6.26	0.46	2.5	1.04	0.27	3.7	1687	1	1	0	0	1	3	1
347	0	1	18	20.42	103	65	0	0	0	0	3.46	1.72	114	245	39.9	55.9	146.72	347.1	1.1	3.48	0.65	3.64	11.4	1.09	3.11	0.7	0.12	1.78	511	1	0	0	0	0	0	1
348	0	0	53	27.11	125	65	1	0	1	0	2.45	2.16	111	129	38.8	117.9	45.53	408.7	0.84	5.67	1.2	1.39	5.69	1.38	2.53	0.74	0.244	2.65	185	1	1	0	0	1	1	1
349	0	0	28	23.64	115	80	0	0	0	0	4.26	1.73	133	183	33.7	45.9	130.5	392.4	0.6	5.04	1.41	1.13	9.11	2.86	2.88	0.9	0.19	1.62	9	1	1	1	1	0	1	1
350	0	0	22	25.72	110	85	0	0	0	0	3.92	1.24	111	219	37.9	92	76.4	393	0.84	5.92	1.99	1.08	5.14	0.86	1.26	0.79	0.209	1.4	845	1	0	1	0	0	1	1
351	0	1	19	28.61	115	73	0	0	0	0	3.64	1.61	158	292	47.7	89.2	107.45	435.6	0.97	5.65	1.38	1.15	14.26	1.1	1.76	1.04	0.22	2.05	1	1	0	1	0	0	2	1
352	0	1	51	27.13	129	98	0	0	1	0	4.47	1.01	164	163	38.3	68	105.12		2.59	4.91	1.04	0.2	10.69	1.22	3.1	1.35	0.31	1.5	0	1	0	0	0	0	1	1
353	0	1	19	26.73	118	76	0	0	0	0	3.68	1.7	167	297	49.8	92	104.99	458.5	1.08	5.89	1.34	0.9	15.5	1.23	1.96	1.18	0.197	2.14	1	1	0	1	0	0	2	1
354	1	0	47	20.89	142	110	1	0	1	0	2.62	1.09	117	194	38.56	97.3	59.9	315	1.11	5.71	2.15	0.08	9.8	0.697	2.74	0.8	0.349	1.68	8	1	0	0	1	0	1	1
355	1	0	29	24.77	133	97	0	0	1	0	5.46	2.83	145	221	38.44	98.8	66.71	375.3	0.9	4.61	1.77	5.77	6.81	0.69	2.11	1.25	0.2	2.7	0	1	0	1	1	1	1	1
356	0	1	41	28.99	141	81	0	0	1	1	5.46	1.21	139	184	43.5	107	73.89	449	1.32			0.6	8.52	1.17	2.62	0.96	0.27	2.3	13	1	0	1	0	0	2	1
357	0	1	40	26.88	134	76	0	0	0	1	5.1	1.1	136	178	41.4	103.8	77.19	426.6	1.21	3.75	0.62	0.85	7.84	2.4	2.36	0.84	0.31	2.19	10	1	0	1	0	0	2	1
358	1	0	31	28.33	124	91	0	0	1	0	7.68	0.49	89	77	45.1	99.8	65	428	1.7	4.41	1.06	5.3	13.25	1.15	1.63	1.44	0.372	1.61	235	1	0	1	1	1	1	1
359	0	1	34	24.91	138	89	0	0	0	0	4.08	1.24	143	242	42.3	77.1	112.49	420	1.05	4.22	6.91	3.77	16.34	1.22	7.79	1.35	0.343	1.77	636	1	1	0	0	0	1	1
360	0	0	49	24.17	166	97	0	0	1	0	4.12	1.06	105	247	40.1	88.7	66.04	315.2	1.11	5.05	1.32	3.68	9.75	2.01	4.28	0.75	0.33	1.69	16	1	0	0	1	0	2	1
361	1	1	71	28.33	157	97	0	1	1	0	7.47	2	132	187	26.57	85.7	78.28	408	1.49			2.14	9.9	1.18	3.52	1.087	0.279	6.7	10	1	0	1	0	0	0	1
362	0	0	50	22.29	171	100	0	0	1	0	4.36	1.15	114	252	42.2	87	67.14	331.8	1.22	5.26	1.28	1.3	10.6	1.75	4.75	0.855	0.29	1.84	20	1	0	0	1	0	2	1
363	0	0	32	24.73	131	95	0	0	1	0	3.27	1.38	140	160	46.2	53	121.02	322.1	0.88	5	2.7	0.55	11.32	2.03	2.06	1.06	0.49	1.43	16	1	0	0	0	0	1	1
364	0	0	47	37.39	149	92	1	0	1	0	3.97	1.28	112	134	36.8	144.5	37.13	445.6	1.75	4.02	1.66	8.48	10.38	4.5	1.92	1.16	0.18	2.49	2	1	0	1	1	0	1	1
365	0	0	48	24.43	145	83	0	0	1	0	4.98	1.08	91	350	43.3	54	107.5	249.8	0.81	3.89	1.2	1.09	16.34	2.21	6.86	0.84	0.197	1.66	158	0	0	1	0	0	1	1
366	0	1	36	18.82	143	103	1	0	1	0	8.84	2.93	139	287	42.4	278	24.13	409.7	2.79	6.62	5.07	2.6	12.5	1.06	3.67	1.31	0.379	3.89	58	1	0	1	1	0	0	1
367	1	0	20	19.65	112	83	0	0	1	0	4.36	1.46	101	366	32	108.4	63.54	349	1.4	6.36	2.46	0.1	9.3	2.897	2.37	1.11	0.201	2.32	3689	1	0	1	1	1	0	1
368	1	0	55	24.18	153	95	0	0	1	0	2.08	2.12	117	175	29.06	67.6	87.94	410	1.02			4.37	10.1	0.756	2.61	1.087	0.178	2.8	281	1	1	0	0	1	2	1
369	0	0	34	21.1	165	103	0	0	1	0	5.2	1.42	80	206	31.6	93	69.31	246.4	1.5	3.58	1	1.9	9.14	2.55	2.6	0.84	0.258	3.84	29	1	0	1	0	1	2	1
370	0	0	26	28.84	114	88	0	0	0	0	4.35	2.31	118	343	41.5	64.1	114.97	336	0.83	5.82	1.34	2.74	9.11	1.19	5.86	0.884	0.217	3.22	230	1	0	0	1	0	2	1
371	0	1	25	27.2	120	65	0	0	0	0	2.81	1.59	108	199	36.3	94	96.7	473.2	1.18	3.31	0.85	0.2	7.52	0.73	4.04	0.499	0.16	1.29	131	1	1	1	0	1	3	1
372	1	1	56	25.08	176	113	1	0	1	1	7.02	1.94	154	166	30.6	195	32.19	388.1	1.83	5.99	2.82	10.27	8.7	1.91	3.12	0.9	0.29	4.44	760	1	1	0	0	1	3	1
373	0	0	27	22.03	112	77	0	0	0	0	2.9	1.71	134	239	40.6	50	127.78	282.4	0.66	4.91	0.9	5.76	7.56	1.13	2.06	0.81	0.169	1.34	154	1	0	1	0	1	0	1
374	0	0	33	20.96	137	87	0	0	1	0	2.07	2.02	99	228	36.6	76.5	88.39	370.6	0.84	4.84	0.84	0.55	5.14	1.63	3.02	0.75	0.207	1.4	218	1	1	1	0	1	1	1
375	1	1	48	17.9	130	99	1	1	1	0	4.92	1.29	126	153	26.53	152.4	47.84	309.7	1.74	5.78	1.06	3.58	9.02	0.62	3.62	0.88	0.38	3.84	684	1	0	1	1	1	3	1
376	1	1	43	22.48	137	104	1	1	1	0	5.09	1.38	131	159	27.42	157.1	45.8	326	1.85			1.2	9.8	0.604	4.02	1.003	0.345	3.54	556	1	0	1	1	1	3	1
377	0	1	18	22.17	136	77	0	0	0	0	3.77	1.98	154	229	46.3	78.5	124.94	343.9	0.83	4.63	2	2.6	6.93	2.3	3.32	1.14	0.35	1.71	9	1	1	1	1	1	2	1
378	1	1	49	19.79	152	95	1	1	1	0	4.29	1.76	89	187	26.51	183.3	36.43	277	1.73	3.7	1.03	3.58	6.82	1.63	2.2	1.02	0.13	4.08	87	1	1	1	1	1	1	1
379	0	0	35	21.23	122	84	0	0	1	0	3.23	1.38	136	198	38.4	50.1	120.72	275.7	0.84	3.89	1.67	0.054	11	1.92	3.15	0.73	0.191	2.22	265	1	0	0	0	0	1	1
380	0	0	30	23.16	125	73	0	0	0	0	2.16	1.54	126	212	48.6	55.1	121.18	194.8	0.39	3.46	0.85	9.87	13.04	0.82	2.18	0.88	0.21	2.03	122	1	0	1	0	0	1	1
381	1	0	28	25.47	143	90	0	0	1	0	7.03	2.33	133	210	36.1	56	122.24	383.9	0.9	6.05	4.14	0.3	7.4	0.94	2.66	0.79	0.207	1.36	24	1	0	1	1	0	2	1
382	0	0	34	20.96	118	70	0	0	0	1	5.93	1.78	124	77	41.8	42	128.83	240	0.75	4.51	1.29	2.15	12.3	1.25	1.17	1.06	0.261	1.11	4	1	1	1	0	0	1	1
383	0	1	56	23.67	152	91	0	0	1	0	8.22	2.12	139	180	29.91	73.1	98.51	250.8	0.73	3.27	0.84	0.86	4.2	0.76	0.98	0.74	0.19	3.2	9	1	1	1	0	0	3	1
384	1	1	28	25.88	128	83	0	0	0	1	4.35	1.43	120	252	42.1	93.1	95.78	446.6	1.06	5.1	2.31	5.06	7.71	0.61	4.33	0.88	0.29	2.02	185	1	1	0	0	1	2	1
385	0	0	46	22.74	89	53	1	0	0	0	1.17	0.52	74	179	33	105.8	54.5	304.3	0.84	4.2	2.54	3.84	17.94	1.94	6.86	0.79	0.39	2.38	22	1	0	0	0	0	1	1
386	0	0	47	20.81	96	58	1	0	0	0	1.34	0.61	79	185	34.1	109.1	52.15	320.3	2.59	4.37	2.47	0.85	19.5	2.07	7.62	0.9	0.353	2.01	28	1	0	0	0	0	1	1
387	0	0	27	22.86	220	86	0	0	1	0	3.27	1.73	86	258	40	82.5	84.15	421.3	1.12	4.33	1.26	0.28	14.4	1.78	2.39	0.98	0.304	1.7	12	1	1	0	0	0	0	1
388	0	0	27	21.51	132	95	1	0	1	0	3.28	1.2	95	174	33.6	295.9	17.96	459.7	2.59	4.65	0.84	0.54	8.82	1.41	2.96	0.78	0.27	3.59	106	1	0	0	1	1	0	1
389	0	1	38	22.17			0	0		0	3.12	1.9	135	190	46.3	109.3	73.55	356	1.3	5.32	1.29	1.13	16.4	0.661	3.15	0.942	0.262	1.06	297	1	1	0	1	0	2	1
390	0	0	48	22.86	126	80	0	0	0	0	2.87	1.12	110	113	45	78.9	76.63	283	0.96	5.78	1.15	1.11	9.82	1.44	2.96	0.86	0.229	2.1	165	1	0	1	0	1	2	1
391	0	1	49	29.02	160	90	0	0	1	0	4.58	1.65	149	148	46.5	83.3	94.55	318.9	1.32	3.37	0.99	0.4368	13.5	0.86	4.98	0.8	0.196	1.3	20	0	0	0	0	0	2	1
392	0	1	48	26.95	153	85	0	0	1	0	4.41	1.56	144	142	44.4	85	92.91	303	1.21	3.24	1.02	0.6868	12.42	0.73	4.48	0.7	0.22	2.24	16	0	0	0	0	0	2	1
393	1	0	44	21.93	88	67	1	0	0	0	3.84	0.94	90	128	38.7	99.9	59.24	259.4	1.45	5.9	2.17	0.55	8.65	2.39	2.9	0.84	0.42	1.87	119	1	0	1	0	0	1	1
394	0	1	46	27.96	138	94	0	0	1	0	3.3	1.76	139	195	37.6	64.3	111.4	338.3	0.69	4.66	1.24	0.55	6.27	1.26	3.53	0.71	0.24	1.59	21	1	0	0	0	0	1	1
395	0	1	47	26.08	143	97	0	0	1	0	3.38	1.79	148	200	38.9	63	111.56	356.1	0.8	4.85	1.2	0.3	6.81	1	3.92	0.654	0.209	1.73	26	1	0	0	0	0	1	1
396	0	1	42	26.22	126	84	0	0	0	0	4.66	1.01	155	163	48.2	59.1	118.62	313.6	0.73	5.58	2.55	0.3	11.1	2.28	2.2	1	0.159	1.44	510	1	0	0	0	0	0	1
397	1	0	55	23.81	144	90	1	0	1	0	4.52	1.64	128	174	40.6	122.2	42.98	403.4	1.58	5.74	5.45	8.98	8.61	1.5	2.95	0.97	0.38	4.47	123	1	0	1	1	0	0	1
398	0	1	35	22.96	120	38	0	0	0	0	4.68	3.95	171	245	49	113.7	71.62	465	1.5	5.18	1.94	3.28	7.08	1.15	2.71	0.729	0.227	1.5	9	1	0	1	0	1	0	1
399	0	1	39	24			0	0		0	4.29	2.29	149	176	39.4	86	97.6	335.4	0.97	3.95	0.8	1.3	14.1	0.883	3.2	0.792	0.242	1.78	123	1	0	0	0	1	1	1
400	0	0	27	25.78	171	100	0	0	1	0	7.73	1.58	143	144	47.1	51	126.95	362.2	0.81	4.41	0.88	0.23	10.6	2.07	1.96	0.79	0.227	5.2	42	1	1	1	0	0	2	1
401	0	1	26	20.81	155	94	0	0	1	0	3.67	1.67	155	259	39.3	76	119.7	378.9	0.85	3.69	1.42	12.3	9.6	1.34	3.67	0.651	0.132	2.45	103	1	1	0	1	1	3	1
402	1	1	50	25.97	115	75	0	1	0	0	4.07	1.1	111	202	27.66	102.7	72.88	457.9	0.98	3.9	1.03	8.13	10.21	2.02	3.93	0.84	0.21	4.58	230	1	1	1	0	1	3	1
403	1	1	28	25.61	134	100	0	0	1	0	5.71	1.88	143	241	44.3	107	80.96	440.5	1.2	4.28	0.68	0.5	5.06	1.19	1.81	0.79	0.28	1.03	183	1	1	1	0	1	0	1
404	0	1	51	28.2	150	103	0	0	1	1	5.21	1.86	133	71	39.97	106.8	69.04	565	1.09	5.32	4.12	0.9	12.1	1.204	2.71	0.88	0.15	1.69	163	1	0	1	1	1	1	1
405	0	1	50	27.13	143	98	0	0	1	0	5.04	1.77	128	51	38.87	103.6	72.12	536.8	0.98	5.11	4.24	14.11	11.96	1.155	2.44	1.02	0.279	1.6	130	1	0	1	1	1	1	1
406	1	0	26	23.31	138	88	1	0	0	0	3.74	1.3	113	208	41.1	114	57.32	594	1.88	5.01	7.56	0.4	14	1.29	2.05	1.1	0.4	3.83	12	1	0	1	0	1	3	1
407	1	1	55	23.04	126	98	0	0	1	0	3.72	0.7	118	86	33.8	54.4	112.02	325.9	1.07	4	1.04	5.58	9.57	2.98	2.72	0.92	0.14	3.21	172	1	1	0	0	0	0	1
408	1	0	24	25.6	93	71	1	0	0	0	6.3	2	120	113	38.25	112.4	59.12	644.1	1.29	5.17	5.53	13.75	6.99	0.58	2.21	0.86	0.25	1.83	244	1	0	0	0	0	2	1
409	1	1	36	23.92	118	94	1	0	1	0	7.16	3.91	139	324	39.7	238	29.11	379.6	2.1	7.05	4.2	1.1	10.3	1.85	2.95	0.869	0.372	3.06	242	1	1	0	1	1	2	1
410	1	1	56	24.9	133	96	0	0	1	1	12.9	1.8	137	117	31.6	91.8	80.03	333.5	1.28	5.94	3.19	1.01	4.86	1.19	2.04	0.81	0.28	3.82	216	1	0	0	1	1	2	1
411	0	1	48	23.57	131	98	0	0	1	0	5.59	1.38	112	119	40.9	119	61.87	506	1.7	4.98	1.45	8.08	20.47	1.05	2.86	1.27	0.52	1.96	83	1	0	1	0	1	2	1
412	1	1	53	20.62	170	100	0	0	1	0	4.52	1.59	130	121	38.9	100	73.71	390.9	1.43	6.83	1.55	0.76	9.01	1.18	1.68	0.91	0.209	4.41	71	1	1	0	0	1	1	1
413	0	1	47	21.46	124	93	0	0	1	0	5.23	1.27	109	113	38.8	115.4	64.65	480.7	1.59	4.78	1.49	10.46	18.83	2.28	2.57	1.12	0.56	1.86	66	1	0	1	0	1	2	1
414	0	0	52	24.03	144	96	0	1	1	0	3.32	1.59	122	328	27.2	70.2	85.81	361.6	0.66	9.6	1.5	10.85	4.68	0.82	1.77	0.73	0.162	6.28	533	1	1	1	0	1	2	1
415	1	0	48	23.81	146	95	0	0	1	0	17.22	2.14	100	223	36.4	89	66.25	370.8	1.28	5.78	1.65	0.08	15.3	3.59	5.08	0.798	0.191	1.1	147	1	1	1	1	1	2	1
416	1	1	34	22.4	148	100	0	0	1	0	4.7	1.43	173	228	42.5	118.9	68.33	352	1.14	1.96		8.47	13.7	1.155	2.18	1.155	0.226	1.99		1	0	1	1	0	1	1
417	1	1	51	23.51			0	0		0	13.07	1.12	161	297	38.5	88	87.25	356.7	1.43	7.02	1.68	1.3	4.16	0.416	1.26	0.848	0.175	4.84	112	1	0	1	0	1	2	1
418	1	1	33	24.33	141	95	0	0	1	0	4.53	1.34	168	208	40.4	115.3	71.41	334.4	1.03	1.88		10.85	12.6	1.03	1.96	1.02	0.26	1.89	0	1	0	1	1	0	1	1
419	0	1	29	20.07	117	78	0	0	0	0	5.54	1.03	95	148	36.1	91	97.78	339	1.88	4.14	1	2.6	17.76	0.8	7.06	0.99	0.42	2.09	2103	1	1	1	0	1	2	1
420	1	0	66	20.07	146	88	0	1	1	1	4.56	1.22	106	87	24.6	49	97.81	335	1.1	10.41	3.43	6.38	5.15	2.06	1.57	0.84	0.441	3.51	428	1	1	0	0	1	0	1
421	1	0	65	22	143	85	0	1	1	1	4.39	1.13	103	67	23.71	50	97.84	318.3	0.99	9.99	3.53	8.76	12.4	1.1	4.37	0.9	0.327	4.63	526	1	1	0	0	1	0	1
422	1	1	23	20.62	122	80	1	0	1	1	3.94	2.14	119	221	37.1	279	26.32	434	2.7	4.33	2	1.32	4.19	0.36	2.01	0.644	0.134	4.37	7	1	0	0	1	1	2	1
423	1	0	29	24.56	110	83	0	0	0	0	1.84	1.91	102	335	31	85.7	79.23	524.3	1.43	3.78	2.1	10.09	10.86	1.83	3.02	0.92	0.36	4.42	474	1	1	1	1	1	0	1
424	0	0	61	26.95	151	86	1	0	1	0	5.04	1.28	112	113	32.3	91.8	58.23	286	1.27	5.02	2.45	2.23	5.91	0.71	3.56	1.03	0.44	2.11	70	1	0	0	1	1	1	1
425	1	1	30	28.33	121	86	0	0	0	0	4.78	1.52	152	290	39.8	92	95.82	398.9	1.37	7.54	0.66	0.33	14.2	1.18	2.71	0.851	0.213	2.21	145	1	0	1	1	0	2	1
426	0	0	30	21.51	100	67	0	0	0	0	4.62	1.9	137	264	45.86	26.3	154.56	430	0.8	4.26	0.64	0.93	13.1	1.204	2.3	0.873	0.212	2.51	310	1	0	1	0	0	0	1
427	0	0	29	19.44	93	62	0	0	0	0	4.45	1.81	132	244	43.76	26.8	154.69	408.5	0.69	4.09	0.66	1.18	12.05	1.07	2.07	0.77	0.25	1.44	248	1	0	1	0	0	0	1
428	0	0	65	28.65	127	74	0	0	0	0	3.31	3.25	107	140	25.61	59.1	92.6	389.2	1.13	4.98	1.32	3.5	12.14	1.57	3.4	0.56	0.15	1.95	17	1	1	0	0	0	2	1
429	1	0	41	38.65	113	80	1	0	0	1	16.23	0.3	130	216	38.4	217.9	23.57	420	3.64	5.92	1.35	0.23	6.58	1.19	2.46	0.613	0.173	1.78	58	1	1	1	0	1	0	1
430	0	0	66	29.72	134	79	0	0	1	0	3.48	3.34	112	146	26.5	57.9	92.58	409.7	1.24	5.19	1.28	1.12	13.2	1.7	3.78	0.48	0.135	2.05	21	1	1	0	0	0	2	1
431	1	0	36	22.22	173	99	1	0	1	0	6.51	1.13	106	190	34.3	174	32.04	570.4	1.97	5.36	3.18	1	12.4	1.57	2.77	0.878	0.273	2.45	837	1	0	1	1	1	1	1
432	0	0	35	24.44	112	77	0	0	0	0	5.65	1.31	116	154	43.3	88	73.58	393	1.46	6.02	2.26	0.09	10.34	2.34	1.89	1.16	0.36	4.76	46	1	1	0	0	1	2	1
433	0	0	56	27.37	162	104	0	0	1	0	3.17	1.43	136	214	43.2	72	80.92	472	1.38	5	3.8	3	11.6	0.985	2.72	1.26	0.278	2.32		1	0	1	1	1	2	1
434	0	0	50	29.39	123	82	0	0	1	1	3.02	2.01	106	195	42.61	93.8	61.3	434	1.08	4.95	2.02	3.38	14.3	1.579	5.03	1.042	0.17	2.37	69	1	0	1	1	0	1	1
435	0	0	30	23.5	154	109	0	0	1	0	4.2	2.17	131	266	45.8	71.8	97.46	512	1.02	3.54	2.11	1.4	12.5	1.45	3.76	1.04	0.232	1.37	94	1	0	1	0	0	1	1
436	0	1	35	26.14	144	110	1	0	1	0	4.48	1.51	156	234	45.1	151	50.82	394	1.96	4.52	3.84	3.51	12	1.4	3.74	0.824	0.183	1.35	15	1	0	0	1	0	0	1
437	0	0	49	27.32	116	77	0	0	0	0	2.85	1.92	101	175	40.51	91	64.03	412.3	0.97	4.75	2.08	5.76	13.16	1.45	4.53	0.92	0.19	1.49	55	1	0	1	1	0	1	1
438	0	1	25	25.4	144	97	0	0	1	0	2.65	2.3	155	269	43.3	85	109.21	524.7	2	5.49	0.88	0.4	13.4	1.18	2.32	0.965	0.254	1.6	49	1	0	1	1	0	2	1
439	0	1	52	23.56	133	83	0	0	0	0	3.44	0.75	130	186	38.7	66.3	105.47	222.3	0.96	6.4	1.06	5.58	14.48	2.34	2.31	0.99	0.33	2.85	57	1	0	1	0	1	3	1
440	0	0	43	27.32	131	84	0	0	0	0	2.95	1.89	133	206	38	40.8	122.1	263.9	0.64	4.81		0.39	11.18	1.35	3.76	0.75	0	1.22	66	1	0	1	0	0	1	1
441	1	0	41	25.68	123	75	0	0	0	0	2.3	0.56	97	87	32.4	71.7	90.37	316	1.14	4.53	0.93	0.72	14.3	0.865	5.38	1.23	0.4	1.85	169	1	1	0	0	0	1	1
442	0	1	53	21.67	140	88	0	0	1	0	3.8	0.86	133	192	39.8	65	105.59	234	1.07	6.67	1.03	3.2	15.74	1.11	2.57	1.13	0.29	3	71	1	0	1	0	1	3	1
443	1	0	46	24.45	132	77	0	0	0	0	8.8	2.03	118	106	37.2	64.7	98.77	212.4	0.9	5.16	1.18	1.32	4.67	1.99	1.57	0.76	0.17	2.07	48	1	0	1	0	0	2	1
444	0	1	46	25.71	126	86	0	0	1	0	4.39	2.2	146	106	36.4	94	83.43	344	1.38	4.44	3.17	8.47	9.01	0.95	3.33	1.29	0.43	2.2	239	1	0	0	0	0	2	2
445	1	1	42	25.1	110	82	0	0	0	0	3.5	1.33	153	158	39.1	82	101.21	506	1.26	5.12	1.42	4.24	8.22	1.09	2.82	1.05	0.25	2.17	0	1	1	1	1	0	2	2
446	0	0	44	18.75	110	68	0	0	0	0	4.66	2.86	118	248	39.9	77	81.16	318	1.07	5.41	1.26	0.6	14.51	0.67	3.97	1.12	0.36	1.29	17	1	1	0	0	0	0	2
447	0	0	28	19.02	88	56	0	0	0	0	4.58	1.42	75	204	40.3	33	145.47	288	0.67	3.52	1.89	0.79	8.43	0.97	2.91	1.14	0.19	1.27	320	1	0	1	1	0	1	2
448	1	1	25	24.22	142	101	0	0	0	0	3.57	2.38	156	182	39.9	76	120.54	386	1.07	5.22	1.78	1.09	9.8	1.51	2.66	1.136	0.244	1.41	18	1	1	0	0	0	1	2
449	0	0	29	19.47	122	90	0	0	0	0	4.35	1.13	124	97	40.7	50	125.99	199	0.9	3.35	2.89	0.7	8.43	1.88	2.45	0.97	0.26	1.06	66	1	0	0	0	0	1	2
450	0	0	42	22.03	119	76	0	0	0	0	6.63	1.68	124	119	41.9	61	107.72	349	0.89	4.89	1.26	2.79	16.38	1.75	3.34	0.93	0.19	1.58	0	1	0	0	0	0	1	2
451	0	1	46	24.86	139	97	0	0	0	0	2.88	1.46	155	191	44.6	66	110.21	432	0.98	4.45	1.91	1.41	12.72	1.97	3.56	1.26	0.2	1.26	5	1	0	0	0	0	2	2
452	0	0	42	27.73	105	70	0	0	0	0	5.4	1.98	128	334	40.9	74	86.36	313	1.07	6.53	1.76	0.8	11.55	2.23	2.3	1.42	0.51	3.26	95	1	0	1	1	0	3	2
453	0	1	25	24.98	132	76	0	0	0	0	6.78	1.14	169	209	48.8	86	107.67	512	1	6.74	2.27	4.15	8.21	1.54	2.69	1.43	0.35	1.48	115	1	1	0	0	0	1	2
454	0	0	46	23.31	123	72	0	0	0	0	11.82	3.81	120	218	28.2	64	100.08	306	1.17	5.55	2.24	1.07	10.86	3.22	4.38	1.04	0.27	1.82	128	1	0	0	0	0	0	2
455	0	1	44	23.81	151	92	0	0	0	0	4.29	1.93	171	200	41.46	124.4	60.3	418	1.47	4.98	1.41	0.9	10.24	1.27	3.43	0.956	0.302	1.45	0	1	0	0	0	0	2	2
456	1	0	41	20.28	175	112	0	0	1	0	7.24	0.89	95	272	31.2	96	63.49	396	2.37	6.1	0.58	0.7	7.5	1.94	2.74	0.88	0.27	3.89	425	1	0	0	0	0	3	2
457	1	1	23	22.92	139	79	0	0	0	0	3.42	2.71	152	189	44.1	67	128.74	209	0.99	5.13	0.85	0.68	8.99	0.83	1.28	0.85	0.19	1.02	0	1	1	0	0	0	1	2
458	0	0	35	20.9	136	80	0	0	0	0	3.74	1.61	99	201	36.6	54	117.77	267	0.9	4.98	1.79	2.31	16.38	2.51	3.48	1.24	0.27	4.58	178	1	0	0	0	0	1	2
459	0	0	26	21.48	116	77	0	0	0	0	9.94	0.89	122	220	33.7	36	143.36	178	0.62	5.69	0.89	2.51	5.84	1.87	2.36	1.6	0.33	2.3	33	1	0	1	1	0	1	2
460	1	0	34	24.97	169	108	1	0	1	0	6.11	1.35	114	163	40.6	111	55.95	378	1.8	4.05	1.21	2.99	9	0.7	3.38	1.3	0.4	2.46	26	1	1	0	0	0	3	2
461	0	0	34	24.61	125	88	0	0	0	1	4.24	1.64	140	174	47.6	63	110.97	398	1.11	5.05	2.37	2	11.91	1.57	1.74	1.39	0.21	1.49	0	1	0	0	0	0	1	2
462	1	0	44	24.22	129	81	0	0	0	0	4.62	1.23	129	140	40.7	83	74.12	341	1.07	4.5	1.72	0.6	12.14	2.04	3.02	1.02	0.25	1.64	50	1	1	0	0	0	2	2
463	1	1	19	20.07	128	62	0	0	0	0	4.5	0.9	122	143	29.3	76	125.73	281	1.01	5.17	0.66	8.09	3.69	1.84	1.8	0.96	0.2	2	0	1	1	0	0	0	0	2
464	0	1	55	19.59	136	82	0	0	0	0	3.63	1.71	122	101	33.8	77	97.11	291	1.87	4.72	1.92	1.2	9.11	1	2.85	1.08	0.38	1.57	31	1	1	1	0	0	3	2
465	0	1	26	24.22	145	94	0	0	0	0	5.32	2.03	155	317	43.7	102	86.98	618	1.42	4.05	1.63	2.94	5.38	2.99	2.17	1.05	0.35	1.32	29	1	1	0	0	0	1	2
466	0	0	47	27.58	120	80	0	1	1	0	6.24	1.33	114	210	26.6	82	73.65	439	1.14	5.28	1.89	1.9	7.63	1.32	2.71	0.858	0.235	7.11	0	1	0	0	0	0	0	2
467	0	0	24	30.12	125	86	0	0	0	1	4.26	1.92	147	224	42.69	54	127.24	345	0.84	5.86	3.87	3.4	10.81	1.36	3.64	1.41	0.41	1.98	38	1	0	0	0	0	1	2
468	0	0	37	20.31	147	94	0	0	0	0	4.33	1.24	123	130	36.2	64	106.61	241	1.05	3.24	1.75	11.77	11.3	1.48	3.5	0.867	0.227	1.18	53	1	0	0	1	0	2	2
469	0	0	24	18.52	121	71	0	0	0	0	2.64	1.51	123	224	32.7	51	129.65	249	0.92	6.12	1.32	0.99	9.93	1.78	3.26	0.93	0.223	1.75	16	1	0	0	0	0	2	2
470	0	0	43	24.44	133	87	0	0	1	0	2.88	1.45	111	171	40.5	62	106.21	309	1.18	5.07	3.34	3.54	12.22	1.67	1.64	1.11	0.27	1.42	0	1	0	1	0	0	2	2
471	0	1	18	20.76	117	95	0	1	0	0	4.35	1.08	157	230	17.5	109	84.92	319	1.46	9.47	1.53	16.75	1.49	1	1.44	1.1	0.21	4.86	0	1	0	0	0	0	2	2
472	0	0	46	16.35	113	74	0	0	0	0	3.19	0.97	102	131	36.8	60	105.3	321	0.91	5.22	1.84	0.3	12.26	1.2	3.72	1.06	0.29	1.16	3170	1	0	1	0	0	1	2
473	0	1	37	28.55	151	126	0	0	1	0	5.93	2.22	180	409	41.7	122	64.84	416	1.44	4.09	2.12	9.87	12.55	1.05	3.51	0.963	0.393	1.33	2	1	0	0	0	0	1	2
474	0	0	27	19.84	128	91	0	0	0	0	2.94	1.3	105	54	36.3	68	106.29	245	1.06	3.56	0.6	0.6	9.72	0.91	2.11	0.66	0.15	1.37	0	1	0	1	0	0	2	2
475	1	1	19	32.28	137	78	0	0	0	0	5.46	2.01	161	195	35.4	76	125.73	477	1.31	5.28	1.69	9.17	8.49	1.09	2.78	1.52	0.39	4.68	7	1	1	0	0	1	0	2
476	0	1	26	31.79	118	78	0	0	0	0	3.24	2.55	161	184	49.4	62	130.14	516	0.9	4.06	2.88	0.9	12.23	0.88	2.01	1.44	0.32	1.36	0	1	0	0	0	0	2	2
477	0	0	38	21.64	139	83	0	0	0	0	4.44	1.53	120	277	41.6	47	120.71	293	1.01	4.84	2.84	1.6	12.87	1.31	3.52	1.1	0.2	1.06	6	1	0	0	0	0	3	2
478	0	0	49	26.95	150	110	0	0	0	0	6.93	2.35	123	254	39.8	95	60.78	380	1.32	4.97	3.01	2	11.01	1.07	2.09	1.12	0.19	1.14	247	1	0	1	0	0	2	2
479	1	1	29	18.73	124	70	0	0	0	0	5	1.19	151	136	36.81	79	116	316	1.14	4.54	2.28	0.4	11.61	0.68	5.41	0.92	0.2	1.43	3	1	1	0	0	0	2	2
480	0	0	33	22.89	115	88	0	0	0	0	7.93	0.32	99	173	34.4	95	68.01	361	1.18	4.39	1.41	0.2	7.35	0.86	2.77	0.97	0.21	1.42	33	1	1	0	0	0	2	2
481	0	1	39	27.51	158	93	0	0	1	0	2.46	3.48	164	97	45.4	99	82.31	467	1.23	4.63	2.59	2.21	12.8	1.73	4.05	0.95	0.23	1.13	56	1	0	1	0	0	1	2
482	0	0	56	18.43	137	78	0	0	0	0	3.8	2.1	125	278	35.1	62	96.94	262	0.94	4.71	1.97	3.7	11.07	1.88	2.34	1.05	0.15	1.52	0	1	0	1	0	0	0	2
483	1	0	30	19.36	124	81	1	0	0	0	4.83	1.15	110	97	31.6	145	41.66	435	1.88	5.21	1.74	0.5	7.81	0.97	2.3	0.8	0.24	3.87	83	1	1	0	1	0	2	2
484	0	0	46	21.6	120	74	0	0	1	0	4.67	1.14	74	220	43.4	61	104.73	370	1.28	4.04	0.64	1.75	11.19	1.73	2.74	0.94	0.225	1.19	2	1	0	0	0	0	1	2
485	0	1	47	24.34	135	91	0	0	1	0	3.52	0.86	137	226	42.3	72	105.6	398	1.02	4.54	2.4	2.57	12.19	1.37	3.01	0.988	0.256	1.09	12	1	1	0	1	1	2	2
486	0	0	20	18.49	155	76	0	0	0	0	5.48	1.2	94	163	42.06	59	127.1	166	1.07	3.48	0.67	1.76	11.19	1.42	3.29	0.906	0.239	1.57	120	1	0	0	0	1	2	2
487	0	0	48	28.04	132	80	0	0	1	0	7.25	1.65	104	182	26.3	77	78.91	268	1.43	5.1	1.66	1.63	13.49	1.49	2.87	0.96	0.27	1.37	12	1	0	0	0	0	0	2
488	0	0	33	20.12	118	62	1	0	0	0	4.43	1.61	136	178	38.8	117	52.87	424	1.35	3.77	0.69	3.98	9.85	1.37	4.3	0.97	0.23	1.41	14	1	0	0	0	0	2	2
489	0	0	29	22.26	113	92	0	0	0	0	2.44	1.54	96	127	38.2	56	121.38	276	0.82	4.75	0.77	9.28	14.52	2.15	3.27	1.32	0.37	2.135	13	1	0	1	0	0	1	2
490	1	0	49	28.52	110	76	1	0	1	0	19.18	0.97	118	200	40.4	104	54.48	315	1.25	4.19	1.29	2.74	10.72	1.26	2.65	0.94	0.24	3.35	33	1	0	0	1	0	2	2
491	1	0	46	23.05	140	100	0	0	0	0	4.94	1.75	130	236	35.6	83	73.09	358	1.11	4.61	2.47	3.36	10.39	3.26	2.99	1.03	0.31	1.44	25	1	0	1	1	0	1	2
492	0	0	35	19.47	183	110	0	0	1	0	3.58	1.25	126	190	41.41	68	100.48	211	0.78	4.71	1.2	3.9	12.05	1.38	1.48	1.09	0.25	1.464	161	1	1	1	0	0	3	2
493	1	0	28	20.04	138	83	0	0	1	0	4.53	1.65	116	186	39.2	90.2	75	361	1.34	6.33	2.62	7.82	10.55	2	2.42	1.028	0.265	2.19	0	1	1	1	1	1	2	2
494	1	1	42	22.21	139	109	0	0	0	0	4.71	1.41	154	235	45.2	113	68.68	385	1.21	4.71	2.48	3.9	11.09	2.54	4.18	1.18	0.26	1.1	5	1	0	0	0	0	1	2
495	1	0	29	29.34	132	80	0	1	0	0	14.43	1.04	108	203	29.7	91	73.69	407	1.04	4.93	3.21	3.12	7.65	1.01	2.94	0.956	0.325	2.17	64	1	0	0	0	0	3	2
496	0	1	64	21.26	173	104	1	1	1	0	5.6	1.9	89	266	27.2	192	31	463	3.59	4.16	2.36	7.08	8.74	1.24	3.3	0.959	0.294	6.53	742	1	0	0	0	0	0	2
497	1	0	18	29.34	130	80	0	1	0	0	4.47	2.58	130	201	29.7	45	142.91	315	0.84	7.83	2.22	5.31	6.53	2.71	4.01	1.35	0.33	3.05	6	1	1	0	0	0	0	2
498	0	0	62	24.8	131	100	0	0	0	0	2.37	1.54	122	103	37.1	59	94.63	251	0.86	5.57	3.36	1.55	13.3	1.21	3.22	0.892	0.28	3.41	194	1	1	0	0	0	1	2
499	1	0	31	15.23	118	92	0	0	0	0	3.67	1.14	131	147	41.1	68	103.34	427	0.88	5.52	1.2	0.3	14.25	2.87	4.34	0.96	0.23	1.05	16	1	1	1	0	0	1	2
500	0	0	27	24.41	110	86	0	0	1	0	3.69	1.98	133	225	43.2	63	116.57	356	0.88	4.93	2.05	1.16	12.67	2.85	3.75	1.29	0.25	1.42	12	1	0	1	0	0	0	2
501	0	1	46	23.88	147	95	0	0	1	0	4.16	1.6	135	185	38.8	108	70.54	511	1.53	3.28	1.96	3.98	6.71	1.06	1.64	1.07	0.26	1.24	20	1	1	0	0	1	1	2
502	0	0	39	22.41	138	86	0	0	0	0	2.92	1.22	111	140	43.7	58	111.85	347	1.02	4.82	2.38	2.66	13.61	1.39	2.64	1.11	0.17	1.54	5	1	1	0	0	0	1	2
503	0	0	49	22.03	128	87	0	0	0	0	5.09	1.92	133	269	37.59	84	70.54	369	1.12	4.7	1.36	2.45	11.4	1.32	3.35	0.849	0.24	3.67	37	1	0	0	1	0	2	2
504	0	0	39	23.44	109	53	0	0	0	0	4.51	1.6	124	130	39.1	53	115.22	355	0.7	3.69	1.47	0.2	13.46	1.15	15	1.03	0.19	1.084	0	1	0	1	0	0	1	2
505	1	0	38	18.29	142	74	0	0	0	0	4.16	1.51	114	206	40	82	78.45	373	0.81	5.18	1.32	1.44	13.97	1.38	2.82	0.82	0.2	1.113	9	1	1	0	1	0	2	2
506	0	1	18	19.03	131	72	0	0	0	0	2.44	1.67	128	211	47.3	75	127.3	379	0.74	4.25	3.06	0.7	10.97	0.53	3.87	1.08	0.26	1.08	132	1	1	0	0	0	0	2
507	0	1	22	16.1	117	71	0	0	0	0	4.29	0.98	139	106	41.6	78	121.8	409	1.07	3.01	0.64	2.08	9.15	1.03	2.84	0.79	0.17	2.25	58	1	0	1	0	0	0	2
508	0	1	43	21.67	137	84	1	0	1	0	4.75	1.76	150	225	40.5	128	58.66	440	1.1	4.55	1.01	2.27	9.21	0.76	3.29	0.93	0.28	2.76	31	1	0	0	0	0	3	2
509	0	0	20	21.37	125	72	0	0	0	0	3.59	1.55	124	188	34.7	59	127.1	317	1	5.34	1.68	8.17	9.82	1.43	3	0.925	0.232	1.21	0	1	0	0	0	0	2	2
510	0	0	41	23.81	140	90	1	0	0	0	3.72	0.89	118	131	46.9	125	46.14	338	1.11	4.44	1.29	0.2	14.74	1.68	5	1.15	0.22	1.29	413	1	0	0	0	1	2	2
511	0	1	44	23.05	158	67	0	0	1	0	3.5	0.79	154	142	41	97	81.46	372	1.08	5.04	1.11	4.61	11.73	1	2.39	0.92	0.24	1.12	1	1	0	0	1	0	1	2
512	1	0	29	22.6	114	73	0	0	1	0	4.57	1.27	118	176	42.6	60	118.66	304	0.78	3.71	1.64	6.26	10.94	1.26	3.05	1.23	0.23	1.19	7	1	1	0	1	0	2	2
513	0	0	23	20.63	117	68	0	0	0	0	7.08	3.27	115	347	31.4	47	134.12	321	0.6	5.15	1.56	6.53	6.35	0.83	2.52	1.17	0.2	1.31	312	1	0	0	0	0	2	2
514	1	0	58	38.95	190	110	1	0	1	0	5.24	2.58	78	177	33.2	238	18.8	533	2.85	6.05	1.75	7.87	10.38	0.87	3.37	1.16	0.28	4.3	198	1	1	0	1	0	0	2
515	0	1	28	22.13	128	77	0	0	1	0	3.32	1.5	145	111	41.7	128	65.18	475	1.28	4.27	1.16	0.6	10.73	1	2.34	0.93	0.21	1.11	6	1	0	0	0	0	2	2
516	1	0	27	26.04	114	64	0	0	0	0	5.22	1.61	135	193	39.54	82.3	84.38	332	1.13	4.89	1.34	2.2	10.31	1.36	3.17	0.892	0.248	1.26	9	1	1	0	0	0	1	2
517	0	0	31	19.53	118	71	0	0	0	0	3.11	1.79	113	170	38.7	66	107.14	266	0.99	4.99	1.94	3.2	11.12	2.46	2.55	0.89	0.26	1.27	15	1	0	0	0	0	0	2
518	1	0	30	24.03	185	120	0	0	1	0	3.83	1.39	132	132	39.7	83	81.78	287	1.17	4.92	1.72	0.3	6.34	1.37	1.32	1.15	0.26	2.05	8	1	0	1	1	0	1	2
519	0	1	46	26.37	139	88	0	0	1	0	8.37	2.29	142	248	37.2	94	83.43	433	1.02	4.8	1.42	4.42	10.53	0.42	3.2	1.11	0.52	1.12	32	1	0	0	0	0	0	2
520	1	0	33	23.05	145	105	0	0	1	0	3.77	1.73	117	153	34.7	60	115.37	296	0.87	4.7	1.85	3.97	9.09	1.14	2.89	0.95	0.26	3.65	4	1	0	0	1	0	2	2
521	0	1	48	24.62	110	84	1	0	1	0	5.16	1.56	143	226	42	142	49.96	590	1.22	4.26	5.01	1.75	9.55	0.71	1.69	0.98	0.3	1.25	2	1	1	0	0	0	1	2
522	1	1	29	25.54	134	74	0	0	0	0	5.92	2.04	141	151	47.2	92	96.49	691	1.36	6.93	3.13	0.8	9.61	0.83	3.08	1.59	0.42	1.71	8	1	1	1	1	0	1	2
523	1	0	18	23.56	110	83	0	1	0	0	5.74	1.51	147	380	26.6	70	110.87	219	1.07	8.61	1.82	0.39	3.6	1.07	2.46	1.1	0.65	1.16	5113	1	1	0	0	0	2	2
524	1	0	45	24.18	137	82	0	0	0	0	3.62	1.56	119	160	37.8	82	74.69	337	0.9	4.21	1.06	0.73	8.11	1.74	3.6	0.97	0.18	1.34	23	1	0	1	1	0	2	2
525	0	1	44	25.95	137	97	0	0	1	0	3.77	1.52	157	110	41.6	106	73.17	403	1.24	4.58	2.59	0.3	9.56	0.76	2.21	1.22	0.35	1.54	16	1	0	1	1	0	2	2
526	1	0	24	29.3	140	70	0	0	0	0	6.53	3.53	130	255	31.9	97	70.65	481	1.61	4.52	2.03	12.67	7.02	1.39	2.11	0.97	0.41	4.08	5	1	1	0	0	0	2	2
527	0	0	29	26.71	127	72	0	0	0	0	8.38	1.48	142	179	41.6	51	125.18	367	0.94	4.85	6.97	0.4	11.43	1.31	2.64	1	0.16	1.88	6	1	1	1	0	0	1	2
528	1	0	35	25.16	123	91	0	0	0	0	4.41	1.81	117	209	33.1	53	118.5	237	0.61	5.2	2.01	2.72	8.25	3.85	3.79	0.88	0.25	2	145	1	0	0	0	0	3	2
529	1	0	56	28.4	111	80	0	0	0	0	4.13	1.19	126	112	41.6	79	72.32	344	1.47	4.3	3.31	5.35	10.9	1.45	3.43	1.22	0.35	2.76	172	1	1	1	0	1	2	2
530	1	0	42	23.83	148	108	0	0	1	0	3.09	1.18	124	164	36.9	88	70.04	339	1.65	4.98	2.85	0.57	13.43	1.53	2.62	0.86	0.24	4.45	198	1	0	0	0	0	2	2
531	0	0	52	23.23	166	100	1	0	1	0	2.58	0.87	102	119	33.4	97	58.04	305	1.51	5.07	2.49	6.67	8.25	1.34	1.03	1	0.48	3.82	73	1	0	1	0	0	2	2
532	1	0	46	25.96	127	88	0	0	0	0	4.32	1.61	138	263	39.7	62	103.99	287	1.11	5.99	1.76	7.04	11.57	0.86	2.49	1.49	0.34	2.14	98	1	0	0	1	0	1	2
533	0	0	45	20.55	88	63	0	0	0	0	5.87	2.17	123	152	36	68	93.66	294	1.02	4.36	1.31	1	15.63	1.14	2.86	1.12	0.35	1.14	14	1	0	0	0	0	2	2
534	0	0	29	23.19	111	73	0	0	0	0	1.76	1.08	127	204	40.6	64	112.77	274	0.99	4.38	1.75	0.35	13.57	2.03	3.13	0.94	0.14	1.21	333	1	0	0	0	0	2	2
535	1	0	47	28.04	123	93	0	0	1	0	2.27	1.22	125	152	37.2	75	82.04	315	1.16	6.11	1.52	2.13	8.9	1.02	3.25	1.13	0.28	2.19	3	1	0	0	1	0	1	2
536	0	1	39	28.2	136	92	0	0	0	0	4.66	1.7	154	211	41.1	78	108.09	474	1.06	4.94	1.83	0.2	9.37	0.37	3.02	1.29	0.34	1.33	14	1	0	0	0	0	1	2
537	0	0	50	23.28	126	75	0	0	0	0	2.51	1.27	111	98	35	28	131.56	149	0.7	3.34	0.63	0.56	11.11	1.74	2.91	1	0.26	1.28	43	1	0	0	0	0	2	2
538	1	1	48	25.95	156	102	0	1	1	1	6.65	2.29	146	222	27.6	86	91.6	291	1.2	9.07	2.55	1.43	4.32	0.84	3.63	1.15	0.24	3.95	135	1	1	1	0	0	0	2
539	1	0	42	22.19	140	86	0	0	1	1	4.71	1.14	48	209	32.2	91	67.26	546	1.94	4.67	0.97	0.6	9.03	1.42	3.41	1.15	0.44	2.19	34	1	1	0	0	1	3	2
540	0	0	32	23.44	158	122	0	0	1	0	5.28	0.68	120	164	47.8	66	106.39	354	1.13	4.13	1.67	2.28	11.71	1.55	3.1	1.41	0.38	1.47	15	1	0	0	0	0	1	2
541	0	0	33	19.53	97	60	0	0	0	0	3.01	1.52	112	134	35.1	56	118.02	288	0.9	5.2	1.39	0.09	7.83	1.54	1.55	0.83	0.14	1.17	16	1	1	1	0	0	1	2
542	0	1	22	24.24	117	77	0	0	0	0	3.26	1.37	117	150	37.3	81	118.22	551	1.64	3.1	1.26	1.21	10.1	1.54	3.27	1.03	0.3	1.57	15	1	0	0	1	0	0	2
543	0	0	32	22.27	125	89	0	0	0	0	8.4	1.96	126	227	42.46	64.5	109.39	383	0.88	6.93	1.73	2.93	6.91	0.58	1.5	1.06	0.29	1.06	0	1	1	1	0	0	1	2
544	0	0	36	25.48	132	74	0	0	0	0	3.86	1.64	117	144	35.4	46	123.28	321	0.85	5.24	1.97	8.05	14.82	3.24	5.42	1.32	0.35	1.43	30	1	0	1	0	0	1	2
545	1	1	30	24.49	160	98	0	1	1	0	3.92	1.97	156	141	27.5	94	93.35	402	1.41	4.28	1.56	11.5	4.39	0.49	1.76	1.11	0.26	6.41	58	1	0	1	1	1	0	2
546	0	1	57	20.9	140	91	0	0	1	0	2.78	0.97	141	187	44	92	79.26	386	1.01	5.52	0.74	6.09	8.99	0.62	3.83	1.1	0.22	1.17	0	1	0	1	0	0	1	2
547	0	0	51	19.56	120	90	0	0	1	0	2.79	1.33	128	150	37	56	104	223	1.09	3.99	1.12	0.62	7.51	1.85	2.11	0.81	0.23	1.14	39	1	0	0	0	0	1	2
548	1	1	51	25.71	137	85	0	1	0	0	7.15	1.13	140	260	27.8	105	70.46	309	1.34	8.12	1.66	3.37	4.62	1.3	3.05	1.34	0.4	4.18	511	1	1	0	1	0	3	2
549	1	1	43	23.88	153	91	0	0	1	0	5.76	1.79	162	217	39.4	98	81.02	371	0.99	5.16	2.39	2.55	12.84	0.7	2.55	0.71	0.17	1.19	0	1	1	0	0	1	1	2
550	0	0	33	20.83	147	89	0	0	0	0	3.25	1.7	126	164	42.5	75	90.52	281	1.05	4.13	0.84	4.11	17.89	0.95	2.77	0.93	0.49	3.58	5	1	0	0	0	0	0	2
551	0	0	51	23.94	136	89	0	0	0	0	3.73	0.74	125	107	45.3	74	81.07	419	1.42	4.4	2.19	28.52	14.88	1.97	2.78	1.1	0.37	1.16	2	1	0	1	0	0	1	2
552	0	0	40	21.64	114	80	0	0	0	0	7.24	0.92	124	368	45.34	72.9	89.18	424	1.02	5.29	1.07	1.52	16.07	1.85	4.55	1.43	0.31	1.12	70	1	0	0	0	0	1	2
553	1	1	50	27.18	148	98	0	0	1	0	3.71	2.69	139	315	37.3	77	100.58	445	1.07	5.75	2.14	1.88	8.77	1.52	2.7	1.03	0.18	1.19	13	1	1	0	1	1	3	2
