# Supplementary material for: Development and internal and external validation of a nomogram model for predicting the risk of chronic kidney disease progression in IgA nephropathy patients
Source: PeerJ. 2024 Oct 30;12:e18416. doi: 10.7717/peerj.18416 (PMC11531260; doi:10.7717/peerj.18416)
Supplement: Supplemental Information 3 [file peerj-12-18416-s003.xlsx]

## Sheet: Sheet1
Y	Sex	CKD stage	Nephrotic syndrome	Hypertension	Diabetes	M1	E1	S1	T1/2	C1/2	Treatment	Group
0=Low risk of CKD progression	0=Female	0=Stage 1-2	0=No	0=No	0=No	0=No	0=No	0=No	0=No	0=No	0=Others	0=Training set
1=High risk of CKD progression	1=Male	1=Stage 3-4	1=Yes	1=Yes	1=Yes	1=Yes	1=Yes	1=Yes	1=Yes	1=Yes	1=RAASi alone	1=internal validation set
											2=RAASi + Glucocorticoid	2=external validation set
											3=RAASi + Glucocorticoid + Immunosuppressant
